# Supplementary material for: circRASSF2 Acts as ceRNA and Promotes Papillary Thyroid Carcinoma Progression through miR-1178/TLR4 Signaling Pathway
Source: PubMed Central journal article supplement — Mol Ther Nucleic Acids. 2020 Jan 15;19:1153–63. doi: 10.1016/j.omtn.2019.11.037 (PMC7016041; doi:10.1016/j.omtn.2019.11.037), 2020-01-15
Supplement: mmc1.pdf [file mmc1.pdf]

**OMTN, Volume 19**

**Supplemental Information**

**circRASSF2 Acts as ceRNA and Promotes**

**Papillary Thyroid Carcinoma Progression**

**through miR-1178/TLR4 Signaling Pathway**

**Wenhong Zhou, Guojun Wu, Jiyu Li, Xiaona Lin, Yongjie Sun, Hao Xu, Peng Shi, Ling Gao, and Xingsong Tian**

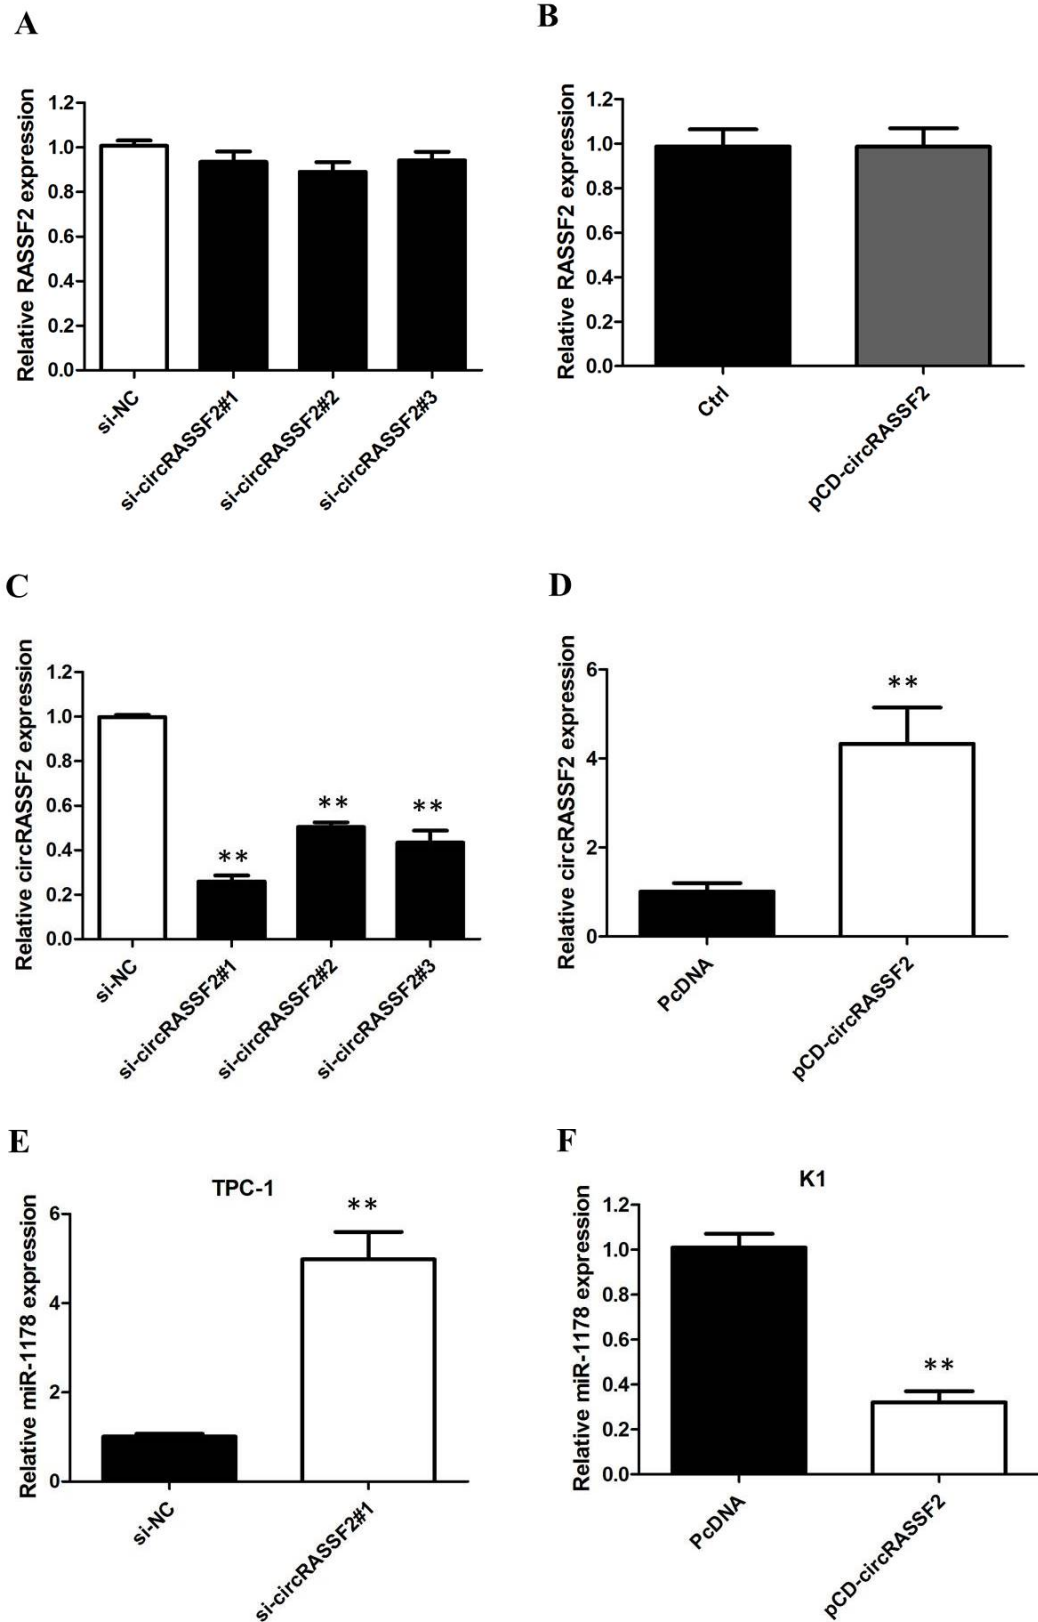

**Fig. S1. A.** The qRT-PCR assay indicated the relative abundance of

RASSF2 in TPC-1 cells treated with si-circRASSF2. B. The qRT-PCR assay indicated the relative abundance of RASSF2 in K1 cells infected with circRASSF2 overexpression plasmid. C. The qRT-PCR assay indicated the relative abundance of circRASSF2 in TPC-1 cells treated with si-circRASSF2. D. The qRT-PCR assay indicated the relative abundance of circRASSF2 in K1 cells infected with circRASSF2 overexpression plasmid. E. The qRT-PCR assay indicated that miR-1178 was efficiently upregulated by silenced circRASSF2; F. The qRT-PCR assay indicated that miR-1178 was efficiently downregulated by overexpressed circRASSF2. Data are the means  $\pm$  SD of three experiments.  $**P < 0.01$ .

**A**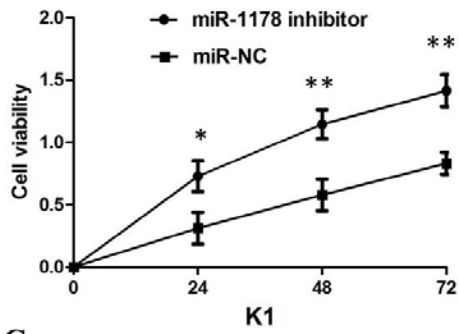**B**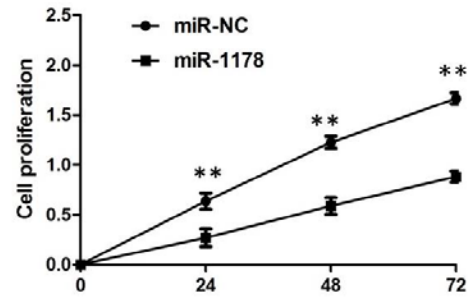**C**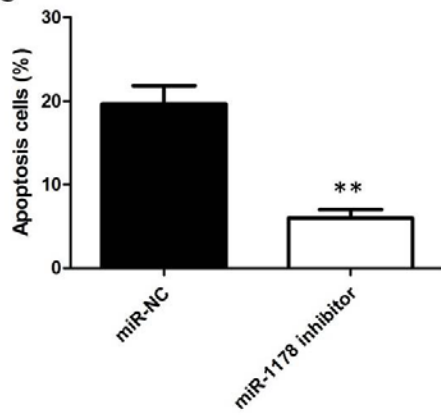**D**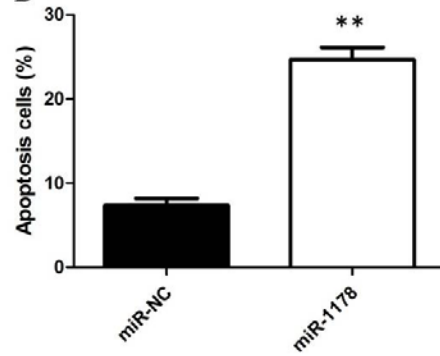**E**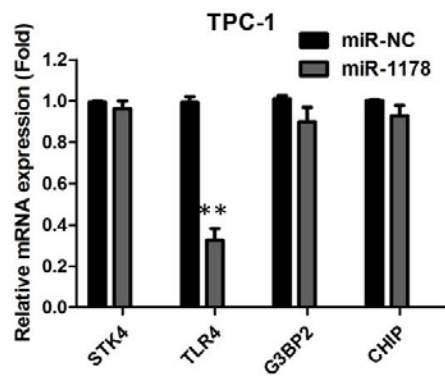**F**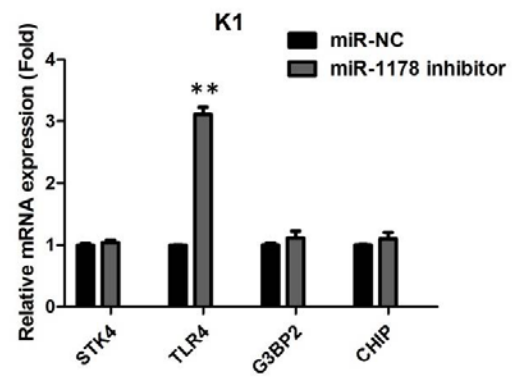**G**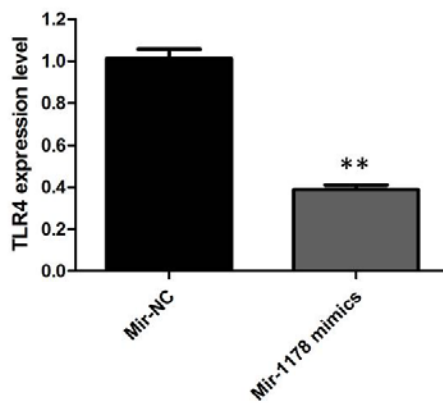**H**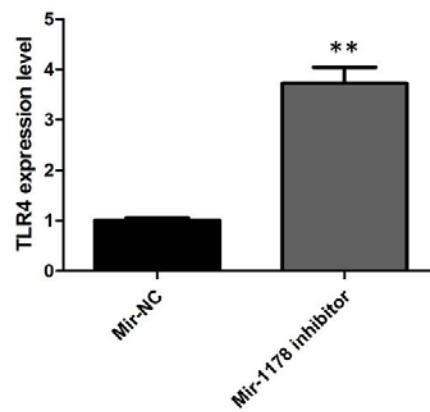

**Fig. S2** A. CCK-8 assay showed that miR-1178 inhibitor markedly promoted the cell growth of K1 cells when compared with cells transfected with miR-nc; B. CCK-8 assay showed that miR-1178 mimics markedly inhibited the proliferation of A2780 cells when compared with cells transfected with miR-nc; C. Flow cytometric analysis showed that miR-11178 inhibitor decreased the apoptosis of K1 cells; D. Flow cytometric analysis showed that miR-1178 mimics significantly induced apoptosis of TPC-1 cells; E. The qRT-PCR assay indicated the relative abundance of mRNAs of STK4, TLR4, G3BP2, and CHIP in TPC-1 cells transfected with a miR-1178 mimic; F. The qRT-PCR assay indicated the relative abundance of STK4, TLR4, G3BP2, and CHIP in K1 cells transfected with a miR-1178 inhibitor; G. The qRT-PCR assay indicated the relative abundance of TLR4 in TPC-1 cells transfected with miR-1178 mimics; H. The qRT-PCR assay indicated the relative abundance of TLR4 in K1 cells transfected with miR-1178 inhibitors; Data are the means  $\pm$  SD of three experiments.  $**P < 0.05$ ;  $***P < 0.01$ .
