# Supplementary material for: circRASSF2 Acts as ceRNA and Promotes Papillary Thyroid Carcinoma Progression through miR-1178/TLR4 Signaling Pathway
Source: PubMed Central journal article supplement — Mol Ther Nucleic Acids. 2020 Jan 15;19:1153–63. doi: 10.1016/j.omtn.2019.11.037 (PMC7016041; doi:10.1016/j.omtn.2019.11.037), 2020-01-15
Supplement: mmc2.pdf [file mmc2.pdf]

| CircRNA<br>Mirbase ID                        | CircRNA (Top) - miRNA (Bottom)<br>pairing | Site<br>Type | CircRN<br>A Start |
|----------------------------------------------|-------------------------------------------|--------------|-------------------|
| <a href="#">hsa_circ_0059354 (5' ... 3')</a> | GCACAUGUGCUGCUCGUGAGCAG<br><br>           | 7mer-m8      | 535               |
| <a href="#">hsa-miR-1178 (3' ... 5')</a>     | GAUCCCUUCUUGUCACUCGUU                     |              |                   |
| <a href="#">hsa_circ_0059354 (5' ... 3')</a> | AAAUGUCGAGGCUACCUGCAGAU<br><br>           | 7mer-1a      | 1148              |
| <a href="#">hsa-miR-1184 (3' ... 5')</a>     | CCUUCGGUAGUUCAGCGAGUCC                    |              |                   |
| <a href="#">hsa_circ_0059354 (5' ... 3')</a> | UGGUCUUAACGUAGACUGCAGAA<br><br>           | 7mer-1a      | 1841              |
| <a href="#">hsa-miR-1184 (3' ... 5')</a>     | CCUUCGGUAGUUCAGCGAGUCC                    |              |                   |
| <a href="#">hsa_circ_0059354 (5' ... 3')</a> | CCUUUGGAGUCUCCUGCAGAU<br><br>             | 7mer-1a      | 4123              |
| <a href="#">hsa-miR-1184 (3' ... 5')</a>     | CCUUCGGUAGUUCAGCGAGUCC                    |              |                   |

|                                              |                         |  |         |      |
|----------------------------------------------|-------------------------|--|---------|------|
| <a href="#">hsa_circ_0059354 (5' ... 3')</a> | GCCCUGGGACUCCUAUCAGGAAG |  | 7mer-1a | 1487 |
| <a href="#">hsa-miR-1200 (3' ... 5')</a>     | CUCCGAGUCUUACCGAGUCCUC  |  |         |      |
| <a href="#">hsa_circ_0059354 (5' ... 3')</a> | GCGCAAGUACACCGUGCUCCGGC |  | 7mer-m8 | 108  |
| <a href="#">hsa-miR-1203 (3' ... 5')</a>     | CUCGACGUAGGACCGAGGCC    |  |         |      |
| <a href="#">hsa_circ_0059354 (5' ... 3')</a> | ACACAAACCUCCCCAGCUCCGGC |  | 7mer-m8 | 279  |
| <a href="#">hsa-miR-1203 (3' ... 5')</a>     | CUCGACGUAGGACCGAGGCC    |  |         |      |
| <a href="#">hsa_circ_0059354 (5' ... 3')</a> | GAAAUUGCAGGCUACCUGCAGA  |  | 8mer-1a | 1147 |
| <a href="#">hsa-miR-1205 (3' ... 5')</a>     | GAGUUUCGUUUGGACGUCU     |  |         |      |
| <a href="#">hsa_circ_0059354 (5' ... 3')</a> | UGGUCUUAACGUAGACUGCAGAA |  | 7mer-1a | 1841 |
| <a href="#">hsa-miR-1205 (3' ... 5')</a>     | GAGUUUCGUUUGGACGUCU     |  |         |      |

|                                              |                                 |         |      |
|----------------------------------------------|---------------------------------|---------|------|
| <a href="#">hsa_circ_0059354 (5' ... 3')</a> | ACCUUUGGAGUCUUCCUGCAGA<br><br>  | 8mer-1a | 4122 |
| <a href="#">hsa-miR-1205 (3' ... 5')</a>     | GAGUUUCGUUUGGGACGUCU            |         |      |
| <a href="#">hsa_circ_0059354 (5' ... 3')</a> | AAAGAGAAAUUCUACAUGAACA<br><br>  | 8mer-1a | 3773 |
| <a href="#">hsa-miR-1206 (3' ... 5')</a>     | CGAAUUUGUAGAUGUACUUGU           |         |      |
| <a href="#">hsa_circ_0059354 (5' ... 3')</a> | AGGCUGGAGUGCAGUGGUGGGAU<br><br> | 7mer-1a | 3513 |
| <a href="#">hsa-miR-1224-3p (3' ... 5')</a>  | GACUCCUCUCUCCUCCACCCC           |         |      |
| <a href="#">hsa_circ_0059354 (5' ... 3')</a> | GUGUGUUUUAGUAGAGGUGGGG<br><br>  | 7mer-m8 | 3644 |
| <a href="#">hsa-miR-1224-3p (3' ... 5')</a>  | GACUCCUCUCUCCUCCACCCC           |         |      |
| <a href="#">hsa_circ_0059354 (5' ... 3')</a> | AGAUGCACAAGCUGUGGUGGGAA<br><br> | 7mer-1a | 4088 |

|                                              |                             |  |              |
|----------------------------------------------|-----------------------------|--|--------------|
| <a href="#">hsa-miR-1224-3p (3' ... 5')</a>  | GACUCCUCUCUCCUCCACCCC       |  |              |
| <a href="#">hsa circ 0059354 (5' ... 3')</a> | CCUGUGUGUUUCUCUGUACCCAG     |  | 7mer-m8 981  |
| <a href="#">hsa-miR-1225-5p (3' ... 5')</a>  | GGGGGGUGACCCGGCAUGGGUG      |  |              |
| <a href="#">hsa circ 0059354 (5' ... 3')</a> | CAAGAGCCGUGAGCUUGGCACAU     |  | 7mer-1a 518  |
| <a href="#">hsa-miR-1227 (3' ... 5')</a>     | GACCCUUUUUCCACCGUGC         |  |              |
| <a href="#">hsa circ 0059354 (5' ... 3')</a> | UCUCUUCCUCACCAGAAGAGAA      |  | 7mer-1a 3130 |
| <a href="#">hsa-miR-1236 (3' ... 5')</a>     | GACCUCUCUGUCCCCUUCUCC       |  |              |
| <a href="#">hsa circ 0059354 (5' ... 3')</a> | UCUGUGUUUAGAGAG--GGAAGAGG   |  | 7mer-m8 646  |
| <a href="#">hsa-miR-1236 (3' ... 5')</a>     | GACCUCUCUGUCCCCUUCUCC       |  |              |
| <a href="#">hsa circ 0059354 (5' ... 3')</a> | CAGAGCUGGGCAGUU----GAGGAAAG |  |              |

|                                              |                                                                                                                                                          |         |      |
|----------------------------------------------|----------------------------------------------------------------------------------------------------------------------------------------------------------|---------|------|
| <a href="#">hsa-miR-1238 (3' ... 5')</a>     | <pre>                            C C C C G U C U G U C U G C U C C U U C </pre>                                                                          | 7mer-1a | 1699 |
| <a href="#">hsa_circ_0059354 (5' ... 3')</a> | <pre> AAUUUCCACAAAGCAAACUACUA                                      U U G G U A G A G U A U G U U U G G - U U G A U G A A </pre>                          | 8mer-1a | 2196 |
| <a href="#">hsa-miR-1244 (3' ... 5')</a>     | <pre>           A U G U C C A G U U G G C C A - - - G A U C A C U U                                     U A C A U C C G G A A A U C U A G U G A A </pre> | 7mer-m8 | 2316 |
| <a href="#">hsa_circ_0059354 (5' ... 3')</a> | <pre> UCUCCUGUAUGCCUAGAAGGAU                           A A A U C G U G U C A C G A A U A U G U U C U U C C A </pre>                                      | 7mer-1a | 714  |
| <a href="#">hsa-miR-1245 (3' ... 5')</a>     | <pre>           A U G A G A U A U G A U U U C C U A G A G A U                 </pre>                                                                     | 7mer-1a | 3948 |

|                                              |                           |         |      |
|----------------------------------------------|---------------------------|---------|------|
| <a href="#">hsa-miR-1251 (3' ... 5')</a>     | UCGCGGAAACCGUCGAUCUCA     |         |      |
| <a href="#">hsa circ 0059354 (5' ... 3')</a> | GAGGCACUGCCCAUCUCUUCUCC   |         |      |
|                                              |                           | 7mer-m8 | 1653 |
| <a href="#">hsa-miR-1253 (3' ... 5')</a>     | ACGUCCGACUAGA--AGAAGAGA   |         |      |
| <a href="#">hsa circ 0059354 (5' ... 3')</a> | CUGAGACAUGCUGAUGCUUCAAG   |         |      |
|                                              |                           | 7mer-1a | 3087 |
| <a href="#">hsa-miR-127-5p (3' ... 5')</a>   | UAGUCUCGGGAGACUCGAAGUC    |         |      |
| <a href="#">hsa circ 0059354 (5' ... 3')</a> | AUGCCGGUACUUA AAAAGCUUCAU |         |      |
|                                              |                           | 7mer-m8 | 40   |
| <a href="#">hsa-miR-127-5p (3' ... 5')</a>   | UAGUCUCGGGAGACUCGAAGUC    |         |      |
| <a href="#">hsa circ 0059354 (5' ... 3')</a> | GUGGGGUUCAGGGAAGCUCUUUA   |         |      |
|                                              |                           | 8mer-1a | 1348 |
| <a href="#">hsa-miR-1276 (3' ... 5')</a>     | ACAGAGGUGUCCCGAGAAAU      |         |      |
| <a href="#">hsa circ 0059354 (5' ... 3')</a> | UAAGAAAAGGGAAUUCUCUUUA    |         |      |

|                                              |                                                  |         |      |
|----------------------------------------------|--------------------------------------------------|---------|------|
| <a href="#">hsa-miR-1276 (3' ... 5')</a>     | <p>     </p> <p>ACAGAGGUGUCCCGAGAAAU</p>         | 7mer-1a | 3340 |
| <a href="#">hsa circ 0059354 (5' ... 3')</a> | <p>CUCACCAGAAGAGAACAGUACUC</p> <p>     </p>      | 7mer-m8 | 3138 |
| <a href="#">hsa-miR-1278 (3' ... 5')</a>     | <p>UAUCUACUAUACGUGUCAUGAU</p>                    |         |      |
| <a href="#">hsa circ 0059354 (5' ... 3')</a> | <p>AGGCUGGAGUGCAGU-GGUGGGAU</p> <p>         </p> | 7mer-1a | 3513 |
| <a href="#">hsa-miR-1280 (3' ... 5')</a>     | <p>CCCACCGUCGCCACCCU</p>                         |         |      |
| <a href="#">hsa circ 0059354 (5' ... 3')</a> | <p>AGAUGCACAAGCUGUGGUGGGAA</p> <p>     </p>      | 7mer-1a | 4088 |
| <a href="#">hsa-miR-1280 (3' ... 5')</a>     | <p>CCCACCGUCGCCACCCU</p>                         |         |      |
| <a href="#">hsa circ 0059354 (5' ... 3')</a> | <p>UGUCAUCAAGGUCUCCUGCAC</p> <p>           </p>  | 7mer-1a | 1203 |
| <a href="#">hsa-miR-1286 (3' ... 5')</a>     | <p>UCCCGAGUAGAACC----AGGACGU</p>                 |         |      |

|                                              |                                  |         |      |
|----------------------------------------------|----------------------------------|---------|------|
| <a href="#">hsa_circ_0059354 (5' ... 3')</a> | ACACUUUUCCAUUUU-GUCCUGCC<br><br> | 7mer-m8 | 2449 |
| <a href="#">hsa-miR-1286 (3' ... 5')</a>     | UCCCGAGUAGAACCAGGACGU            |         |      |
| <a href="#">hsa_circ_0059354 (5' ... 3')</a> | ACAGUCUGUGCCCUGGGACUCCU<br><br>  | 7mer-m8 | 1478 |
| <a href="#">hsa-miR-1289 (3' ... 5')</a>     | UUUUACGUCUAAGGACCUGAGGU          |         |      |
| <a href="#">hsa_circ_0059354 (5' ... 3')</a> | ACCUAUGUGAUCUUUAAAUCCAA<br><br>  | 7mer-1a | 1431 |
| <a href="#">hsa-miR-1290 (3' ... 5')</a>     | AGGGACUAGGUUUUUAGGU              |         |      |
| <a href="#">hsa_circ_0059354 (5' ... 3')</a> | GGAGAUGCAUCCAAGAAUGAAG<br><br>   | 7mer-1a | 1306 |
| <a href="#">hsa-miR-1298 (3' ... 5')</a>     | AUGUAGACCUGUCGGCUUACUU           |         |      |
| <a href="#">hsa_circ_0059354 (5' ... 3')</a> | GAGAUGUAAAAUAAGAAUGAAU<br><br>   | 7mer-1a | 3966 |



|                                              |                         |  |              |
|----------------------------------------------|-------------------------|--|--------------|
| <a href="#">hsa-miR-1298 (3' ... 5')</a>     | AUGUAGACCUGUCGGCUUACUU  |  |              |
| <a href="#">hsa circ 0059354 (5' ... 3')</a> | UGUGGGCCCCCUUCCAGAU     |  | 7mer-m8 3988 |
| <a href="#">hsa-miR-1299 (3' ... 5')</a>     | AGGGAGUGUGUCUUAAGGUCUU  |  |              |
| <a href="#">hsa circ 0059354 (5' ... 3')</a> | UUUGAAAUAGCAGCAGUUGAAAC |  | 7mer-m8 2530 |
| <a href="#">hsa-miR-1305 (3' ... 5')</a>     | AGAGAGGGUAAUCUCAACUUUU  |  |              |
| <a href="#">hsa circ 0059354 (5' ... 3')</a> | AGGCUGGAGGAGAUAGCCGAGAC |  | 7mer-1a 145  |
| <a href="#">hsa-miR-1307 (3' ... 5')</a>     | GUGCUGGCUGCGGUGCGGCUCA  |  |              |
| <a href="#">hsa circ 0059354 (5' ... 3')</a> | GUGUCACAGAUACAUCGCCGAGA |  | 8mer-1a 3435 |
| <a href="#">hsa-miR-1307 (3' ... 5')</a>     | GUGCUGGCUGCGGUGCGGCUCA  |  |              |
| <a href="#">hsa circ 0059354 (5' ... 3')</a> | GGAGCAGCCACACGUCUGUCUGU |  |              |

|                                              |                               |         |      |
|----------------------------------------------|-------------------------------|---------|------|
| <a href="#">hsa-miR-1324 (3' ... 5')</a>     | CUUUUCACGUAUCUUAAGACAGACC<br> | 7mer-m8 | 628  |
| <a href="#">hsa circ 0059354 (5' ... 3')</a> | CCUGGGUGCCUGGCUAUGGAGAU<br>   | 7mer-1a | 1573 |
| <a href="#">hsa-miR-136 (3' ... 5')</a>      | AGGUAGUAGUUUUGUUUACCUCA       |         |      |
| <a href="#">hsa circ 0059354 (5' ... 3')</a> | UGAGAAGGCUCACAGCUGUGGUC<br>   | 7mer-m8 | 1823 |
| <a href="#">hsa-miR-140-3p (3' ... 5')</a>   | GGCACCAAGAUGGGACACCAU         |         |      |
| <a href="#">hsa circ 0059354 (5' ... 3')</a> | CACAAGAUGCACAAGCUGUGGUG<br>   | 7mer-m8 | 4084 |
| <a href="#">hsa-miR-140-3p (3' ... 5')</a>   | GGCACCAAGAUGGGACACCAU         |         |      |
| <a href="#">hsa circ 0059354 (5' ... 3')</a> | CCCACGUUUUUUACACUGGAAA<br>    | 7mer-1a | 844  |
| <a href="#">hsa-miR-145 (3' ... 5')</a>      | UCCCUAAGGACCCUUUUGACCUG       |         |      |
| <a href="#">hsa circ 0059354 (5' ... 3')</a> | AUCUAACAUAUAUCUGACAGGGCC      |         |      |

|                                              |                              |         |      |
|----------------------------------------------|------------------------------|---------|------|
| <a href="#">hsa-miR-146b-3p (3' ... 5')</a>  | GGUCUUGACUCAGGUGUCCCGU<br>   | 7mer-m8 | 4319 |
| <a href="#">hsa circ 0059354 (5' ... 3')</a> | GCCCACGUAUUUUUACACUGGAA<br>  | 7mer-1a | 843  |
| <a href="#">hsa-miR-1825 (3' ... 5')</a>     | CCUCUCCUCCCGUGACCU           |         |      |
| <a href="#">hsa circ 0059354 (5' ... 3')</a> | UUUGCAGUCAAGACC-AUUCUUUC<br> | 7mer-m8 | 1243 |
| <a href="#">hsa-miR-186 (3' ... 5')</a>      | UCGGGUUUUCCUCUUAAGAAAC       |         |      |
| <a href="#">hsa circ 0059354 (5' ... 3')</a> | ACUCUUCGACCGAAU-UGUGGGAG<br> | 7mer-m8 | 2618 |
| <a href="#">hsa-miR-188-3p (3' ... 5')</a>   | ACGUUUGGGACGUACACCCUC        |         |      |
| <a href="#">hsa circ 0059354 (5' ... 3')</a> | GAUGCACAAGCUGUGGGGAAA<br>    | 7mer-1a | 4089 |
| <a href="#">hsa-miR-188-3p (3' ... 5')</a>   | ACGUUUGGGACGUACACCCUC        |         |      |
| <a href="#">hsa circ 0059354 (5' ... 3')</a> | GGGAGAGGCUUCCUUUGUUACAG      |         |      |

|                                              |                                              |         |      |
|----------------------------------------------|----------------------------------------------|---------|------|
| <a href="#">hsa-miR-194 (3' ... 5')</a>      | <pre>       AGGUGUACCUCAACGACAAUGU </pre>    | 7mer-1a | 2023 |
| <a href="#">hsa circ 0059354 (5' ... 3')</a> | <pre> CCCCGGAGGGCCUUAUGUUACAA </pre>         |         |      |
| <a href="#">hsa-miR-194 (3' ... 5')</a>      | <pre>       AGGUGUACCUCAACG---ACAAUGU </pre> | 7mer-1a | 2766 |
| <a href="#">hsa circ 0059354 (5' ... 3')</a> | <pre> GCUCUUUAGGCCACCUGGUGAAG </pre>         |         |      |
| <a href="#">hsa-miR-197 (3' ... 5')</a>      | <pre>       CGACCCACCUCUCCACCACUU </pre>     | 7mer-1a | 1363 |
| <a href="#">hsa circ 0059354 (5' ... 3')</a> | <pre> CUUCCUGUACGUUUGGUGAAG </pre>           |         |      |
| <a href="#">hsa-miR-197 (3' ... 5')</a>      | <pre>       CGACCCACCUCUCCACCACUU </pre>     | 7mer-1a | 2948 |
| <a href="#">hsa circ 0059354 (5' ... 3')</a> | <pre> AACCACUAGCUCUACUGGACAG </pre>          |         |      |
| <a href="#">hsa-miR-198 (3' ... 5')</a>      | <pre>       CUUGGAUAGAGGGGAGACCUGG </pre>    | 7mer-1a | 2218 |
| <a href="#">hsa circ 0059354 (5' ... 3')</a> | <pre> UGAGAGGGAAGGUGA--UGACUAAA </pre>       |         |      |

|                                              |                            |         |      |
|----------------------------------------------|----------------------------|---------|------|
| <a href="#">hsa-miR-224 (3' ... 5')</a>      | <br>UUGCCUUGGUGAUCACUGAAC  | 7mer-1a | 2871 |
| <a href="#">hsa_circ_0059354 (5' ... 3')</a> | AUGUUUUAAUGCAUCUGACUUAG    | 7mer-1a | 4379 |
| <a href="#">hsa-miR-224 (3' ... 5')</a>      | <br>UUGCCUUGGUGAUCACUGAAC  |         |      |
| <a href="#">hsa_circ_0059354 (5' ... 3')</a> | UCUUUGAUUUGCACUAGCACUAC    | 7mer-1a | 2264 |
| <a href="#">hsa-miR-520f (3' ... 5')</a>     | <br>UUGGGAGAUUUUCCUUCGUGAA |         |      |
| <a href="#">hsa_circ_0059354 (5' ... 3')</a> | GAUCUUACUGAAAUAAGCACUU     | 7mer-m8 | 4401 |
| <a href="#">hsa-miR-520f (3' ... 5')</a>     | <br>UUGGGAGAUUUUCCUUCGUGAA |         |      |
| <a href="#">hsa_circ_0059354 (5' ... 3')</a> | UCCUGCCCCGAUUCAUACCUAU     | 7mer-m8 | 1793 |
| <a href="#">hsa-miR-331-5p (3' ... 5')</a>   | <br>CCUAGGGACCCUGGUAUGGAUC |         |      |

|                                                                                                    |                                                                                                             |                |             |
|----------------------------------------------------------------------------------------------------|-------------------------------------------------------------------------------------------------------------|----------------|-------------|
| <p><a href="#">hsa_circ_0059354 (5' ... 3')</a></p> <p><a href="#">hsa-miR-335 (3' ... 5')</a></p> | <p>CCAUUUUGUCCUGCC-CUCUUGAG</p> <p>                      </p> <p>UGUAAAAAGCAAUAACGAGAACU</p>                | <p>7mer-1a</p> | <p>2457</p> |
| <p><a href="#">hsa_circ_0059354 (5' ... 3')</a></p> <p><a href="#">hsa-miR-346 (3' ... 5')</a></p> | <p>AGGGAGCGAUACUAAGGCAGACU</p> <p>                 </p> <p>UCUCCGUCCGUACGCCCGUCUGU</p>                      | <p>7mer-m8</p> | <p>2343</p> |
| <p><a href="#">hsa_circ_0059354 (5' ... 3')</a></p> <p><a href="#">hsa-miR-346 (3' ... 5')</a></p> | <p>UGGAUGUAGAAGUCAGCAGACAG</p> <p>                                      </p> <p>UCUCCGUCCGUACGCCCGUCUGU</p> | <p>7mer-1a</p> | <p>327</p>  |
| <p><a href="#">hsa_circ_0059354 (5' ... 3')</a></p> <p><a href="#">hsa-miR-370 (3' ... 5')</a></p> | <p>CAUGUGCUGCUCGUGAGCAGGAA</p> <p>                                      </p> <p>UGGUCCAAGGUGGGGUCGUCCG</p>  | <p>7mer-1a</p> | <p>538</p>  |
| <p><a href="#">hsa_circ_0059354 (5' ... 3')</a></p> <p><a href="#">hsa-miR-383 (3' ... 5')</a></p> | <p>UCACGUCCUAAGAACCUGAUCAG</p> <p>                                      </p> <p>UCGGUGUUAGUGGAAGACUAGA</p>  | <p>7mer-1a</p> | <p>2490</p> |

|                                              |                                 |         |      |
|----------------------------------------------|---------------------------------|---------|------|
| <a href="#">hsa_circ_0059354 (5' ... 3')</a> | CUAUCACAAGGGGGUGUUGAAG<br><br>  | 7mer-1a | 4029 |
| <a href="#">hsa-miR-421 (3' ... 5')</a>      | CGCGGGUUAUUACAGACAACUA          |         |      |
| <a href="#">hsa_circ_0059354 (5' ... 3')</a> | UGUGUGGAGAUGCAUCCAAGAA<br><br>  | 7mer-1a | 1301 |
| <a href="#">hsa-miR-432 (3' ... 5')</a>      | GGUGGGUUACUGGAUGAGGUUCU         |         |      |
| <a href="#">hsa_circ_0059354 (5' ... 3')</a> | GUGGAAGUGAGAGGAGAUCCCAU<br><br> | 7mer-m8 | 2394 |
| <a href="#">hsa-miR-450b-3p (3' ... 5')</a>  | AUACCUACGUUUUACUAGGGUU          |         |      |
| <a href="#">hsa_circ_0059354 (5' ... 3')</a> | GUGGAAGUGAGAGGAGAUCCCAU<br><br> | 7mer-m8 | 2394 |
| <a href="#">hsa-miR-769-3p (3' ... 5')</a>   | UUGGUUCUGGGCCUCUAGGGUC          |         |      |
| <a href="#">hsa_circ_0059354 (5' ... 3')</a> | GCCCUGGGCACCCUCCGCCCCC<br><br>  | 7mer-m8 | 1780 |

|                                              |                             |         |      |
|----------------------------------------------|-----------------------------|---------|------|
| <a href="#">hsa-miR-486-3p (3' ... 5')</a>   | UAGGACAUGACUCGACGGGGC       |         |      |
| <a href="#">hsa_circ_0059354 (5' ... 3')</a> | CUUAAUUUAACUUGCCUUUCAG<br>  | 7mer-m8 | 4236 |
| <a href="#">hsa-miR-488 (3' ... 5')</a>      | CUGGUUCUUUAUCGAAAGUU        |         |      |
| <a href="#">hsa_circ_0059354 (5' ... 3')</a> | CCUGUUUCCAGGCUGAUGUUUCU<br> | 7mer-m8 | 4152 |
| <a href="#">hsa-miR-494 (3' ... 5')</a>      | CUCCAAGGGCACA-UACAAAGU      |         |      |
| <a href="#">hsa_circ_0059354 (5' ... 3')</a> | CCGGGAGAGGCUCCUUUGUUAC<br>  | 7mer-1a | 2021 |
| <a href="#">hsa-miR-495 (3' ... 5')</a>      | UUCUUCACGUGGUACAAACAAA      |         |      |
| <a href="#">hsa_circ_0059354 (5' ... 3')</a> | AAUAUCUGUUUCCAUGCAAAAA<br>  | 7mer-1a | 3227 |
| <a href="#">hsa-miR-507 (3' ... 5')</a>      | AAGUGAGUUUUCACGUUUU         |         |      |
| <a href="#">hsa_circ_0059354 (5' ... 3')</a> | AAUAUCUGUUUCCAUGCAAAAA      |         |      |



|                                              |                                                       |         |      |
|----------------------------------------------|-------------------------------------------------------|---------|------|
| <a href="#">hsa-miR-557 (3' ... 5')</a>      | <pre>       UCUGUUCGGGUGGGCACGUUUG </pre>             | 7mer-1a | 3227 |
| <a href="#">hsa_circ_0059354 (5' ... 3')</a> | <pre> UGAAUGCAAACACCUCCUGAGUU </pre>                  |         |      |
| <a href="#">hsa-miR-510 (3' ... 5')</a>      | <pre>       CACUAACGGUGAGAGGACUCAU </pre>             | 7mer-m8 | 2065 |
| <a href="#">hsa_circ_0059354 (5' ... 3')</a> | <pre> CUAAGAACCUGAUCAGAAUUUU </pre>                   |         |      |
| <a href="#">hsa-miR-513a-3p (3' ... 5')</a>  | <pre>              GGAAGAGUCUUUCCA----CUUUAAAU </pre> | 7mer-m8 | 2497 |
| <a href="#">hsa_circ_0059354 (5' ... 3')</a> | <pre> UGCCCAGCCAAAAGA-GAAUUUC </pre>                  |         |      |
| <a href="#">hsa-miR-513a-3p (3' ... 5')</a>  | <pre>              GGAAGAGUCUUUCCACUUUUAAAU </pre>    | 7mer-m8 | 3763 |
| <a href="#">hsa_circ_0059354 (5' ... 3')</a> | <pre> UGGGAAGAACAGUU--CUGUGAAU </pre>                 |         |      |
| <a href="#">hsa-miR-513a-5p (3' ... 5')</a>  | <pre>             UACUGUGGAGGGACACUU </pre>           | 7mer-1a | 2047 |

|                                              |                                 |         |      |
|----------------------------------------------|---------------------------------|---------|------|
| <a href="#">hsa_circ_0059354 (5' ... 3')</a> | UGUUCUAUGUGGAAACCUGUGAA<br><br> | 8mer-1a | 901  |
| <a href="#">hsa-miR-513a-5p (3' ... 5')</a>  | UACUGUGGAGGGACACUU              |         |      |
| <a href="#">hsa_circ_0059354 (5' ... 3')</a> | GCCUAGCUGGGUAGAGGCACUG<br><br>  | 7mer-m8 | 1639 |
| <a href="#">hsa-miR-515-3p (3' ... 5')</a>   | UUGCGAGUUUUCUCCGUGAG            |         |      |
| <a href="#">hsa_circ_0059354 (5' ... 3')</a> | GCCUAGCUGGGUAGAGGCACUG<br><br>  | 7mer-m8 | 1639 |
| <a href="#">hsa-miR-519e (3' ... 5')</a>     | UUGUGAGAUUUUCCUCCGUGAA          |         |      |
| <a href="#">hsa_circ_0059354 (5' ... 3')</a> | GACCCCAGGAAGCUAGGCACUU<br><br>  | 7mer-m8 | 235  |
| <a href="#">hsa-miR-515-3p (3' ... 5')</a>   | UUGCGAGUUUUCU--UCCGUGAG         |         |      |
| <a href="#">hsa_circ_0059354 (5' ... 3')</a> | GACCCCAGGAAGCUAGGCACUU<br><br>  | 7mer-m8 | 235  |

|                                              |                          |  |              |
|----------------------------------------------|--------------------------|--|--------------|
| <a href="#">hsa-miR-519e (3' ... 5')</a>     | UUGUGAGAUUUUCCUCGUGAA    |  |              |
| <a href="#">hsa circ 0059354 (5' ... 3')</a> | AAUUGAGAAAUGAUUUGGAGAA   |  | 8mer-1a 2092 |
| <a href="#">hsa-miR-515-5p (3' ... 5')</a>   | GUCUUUCACGAAAGAAAACCUCUU |  |              |
| <a href="#">hsa circ 0059354 (5' ... 3')</a> | AAACACCUCUGAGUUUUGCAAU   |  | 7mer-1a 2072 |
| <a href="#">hsa-miR-518a-5p (3' ... 5')</a>  | CUUUCCGAAGGAAACGUC       |  |              |
| <a href="#">hsa circ 0059354 (5' ... 3')</a> | AAACACCUCUGAGUUUUGCAAU   |  | 7mer-1a 2072 |
| <a href="#">hsa-miR-527 (3' ... 5')</a>      | CUUUCCGAAGGAAACGUC       |  |              |
| <a href="#">hsa circ 0059354 (5' ... 3')</a> | CAGUUGAAACAGAGACACUUUGC  |  | 7mer-m8 2543 |
| <a href="#">hsa-miR-520g (3' ... 5')</a>     | UGUGAGAUUUCCUUCGUGAAACA  |  |              |
| <a href="#">hsa circ 0059354 (5' ... 3')</a> | CAGUUGAAACAGAGACACUUUGC  |  | 7mer-m8 2543 |

|                                              |                           |  |              |
|----------------------------------------------|---------------------------|--|--------------|
| <a href="#">hsa-miR-520h (3' ... 5')</a>     | UGAGAUUUCCCUUCGUGAAACA    |  |              |
| <a href="#">hsa circ 0059354 (5' ... 3')</a> | ACAAAGAUCUCGCUGGUGCGUAC   |  | 7mer-1a 1057 |
| <a href="#">hsa-miR-521 (3' ... 5')</a>      | UGUGAGAUUUCCCUUCACGCAA    |  |              |
| <a href="#">hsa circ 0059354 (5' ... 3')</a> | AGUGGAAGGAAAUGUCUCAAGAA   |  | 8mer-1a 1034 |
| <a href="#">hsa-miR-526b (3' ... 5')</a>     | UGUCUUUCACGAAGGGAGUUCUC   |  |              |
| <a href="#">hsa circ 0059354 (5' ... 3')</a> | UAAAUCCAACCCCAAUGGGAGAA   |  | 7mer-1a 1445 |
| <a href="#">hsa-miR-532-3p (3' ... 5')</a>   | ACGUUCGGAACCCACACCCUCC    |  |              |
| <a href="#">hsa circ 0059354 (5' ... 3')</a> | UCUCCUUGGAGGACUUGGGAGAA   |  | 7mer-1a 2172 |
| <a href="#">hsa-miR-532-3p (3' ... 5')</a>   | ACGUUCGGAACCCAC---ACCCUCC |  |              |
| <a href="#">hsa circ 0059354 (5' ... 3')</a> | CUCUUCGACCGAUUUGGGAGU     |  |              |

|                                              |                                                                             |         |      |
|----------------------------------------------|-----------------------------------------------------------------------------|---------|------|
| <a href="#">hsa-miR-532-3p (3' ... 5')</a>   | <pre>         ACGUUCGGAACCCACACCCUCC </pre>                                 | 7mer-m8 | 2619 |
| <a href="#">hsa circ 0059354 (5' ... 3')</a> | <pre> CACCUUCUCUCCACAGAAUGUUU         UUCUUCACGUGGCGCUUACAAA </pre>         | 7mer-m8 | 1675 |
| <a href="#">hsa-miR-543 (3' ... 5')</a>      | <pre> GGUAAUUUUUAUUUUGAAUGUUC         UUCUUCACGUGGCGCUUACAAA </pre>         | 7mer-m8 | 2125 |
| <a href="#">hsa circ 0059354 (5' ... 3')</a> | <pre> UCUUUCCAACCUCUGGGUUCUUG               UGUUUUCGUUGACU--CCAAGAAC </pre> | 7mer-m8 | 1260 |
| <a href="#">hsa-miR-548b-3p (3' ... 5')</a>  | <pre> CAGAAUUUUUGGAAGGGUUCUUU         UGUUUUCGUUGACUCCAAGAAC </pre>         | 7mer-m8 | 2510 |
| <a href="#">hsa circ 0059354 (5' ... 3')</a> | <pre> CAGAAUUUUUGGAAGGGUUCUUU         UGUUUUCGUUGACUCCAAGAAC </pre>         | 7mer-m8 | 2510 |

|                                              |                                     |         |      |
|----------------------------------------------|-------------------------------------|---------|------|
| <a href="#">hsa_circ_0059354 (5' ... 3')</a> | ACUUCUCUUCUGGUAUUUUUAU<br><br>      | 7mer-1a | 2114 |
| <a href="#">hsa-miR-548c-3p (3' ... 5')</a>  | CGUUUUCAUUAACUCUAAAAAC              |         |      |
| <a href="#">hsa_circ_0059354 (5' ... 3')</a> | GCAAUAAGCCCACGUUUUUUAC<br><br>      | 7mer-1a | 836  |
| <a href="#">hsa-miR-548c-3p (3' ... 5')</a>  | CGUUUUCAUUAACUCUAAAAAC              |         |      |
| <a href="#">hsa_circ_0059354 (5' ... 3')</a> | UAAAGGACAAAAGAC----CAGUUUAU<br><br> | 7mer-1a | 2676 |
| <a href="#">hsa-miR-548g (3' ... 5')</a>     | CAUGUUUUCAUUAAUGUAAAA               |         |      |
| <a href="#">hsa_circ_0059354 (5' ... 3')</a> | CCAACUUGUGAAAAGCAGUUUAG<br><br>     | 7mer-1a | 2716 |
| <a href="#">hsa-miR-548g (3' ... 5')</a>     | CAUGUUUUCAUUAAUGUAAAA               |         |      |
| <a href="#">hsa_circ_0059354 (5' ... 3')</a> | GUGGUGGGAACCCUCAGUUUAC<br><br>      | 7mer-1a | 4101 |

|                                              |                             |         |      |
|----------------------------------------------|-----------------------------|---------|------|
| <a href="#">hsa-miR-548g (3' ... 5')</a>     | CAUGUUUUCAUUAAUGUCAAAA      |         |      |
| <a href="#">hsa_circ_0059354 (5' ... 3')</a> | CCAUGUGCCUACCUGAUACUUUC<br> | 7mer-m8 | 466  |
| <a href="#">hsa-miR-548l (3' ... 5')</a>     | CUGUUUUGGGCGUUUAUGAAAA      |         |      |
| <a href="#">hsa_circ_0059354 (5' ... 3')</a> | GGGAAACCCUCAGUUUACCUUG<br>  | 7mer-m8 | 4106 |
| <a href="#">hsa-miR-548m (3' ... 5')</a>     | GUUUUUGGUGUUU--AUGGAAAC     |         |      |
| <a href="#">hsa_circ_0059354 (5' ... 3')</a> | CUCUGCCUCCAUGGCUACUUUA<br>  | 8mer-1a | 943  |
| <a href="#">hsa-miR-548m (3' ... 5')</a>     | GUUUUUGGUGUUUAUGGAAAC       |         |      |
| <a href="#">hsa_circ_0059354 (5' ... 3')</a> | CCGGCCAAGCCAUCAUUUGCUAC<br> | 7mer-1a | 297  |
| <a href="#">hsa-miR-548p (3' ... 5')</a>     | UUUCAUUGACGUCAAAAACGAU      |         |      |
| <a href="#">hsa_circ_0059354 (5' ... 3')</a> | GCAGUGGUGGGAUCUCAGCUCAC     |         |      |

|                                              |                                                                     |         |      |
|----------------------------------------------|---------------------------------------------------------------------|---------|------|
| <a href="#">hsa-miR-558 (3' ... 5')</a>      | <pre>                                    UAAAACCAUGUCGUCGAGU </pre> | 7mer-1a | 3523 |
| <a href="#">hsa circ 0059354 (5' ... 3')</a> | <pre>           GUAAGAGCCUUGGAAAUUAACAA </pre>                      |         |      |
| <a href="#">hsa-miR-569 (3' ... 5')</a>      | <pre>           UGAAAGGUCCUAAGUAAUUGA </pre>                        | 7mer-1a | 745  |
| <a href="#">hsa circ 0059354 (5' ... 3')</a> | <pre>           CCCCCCAAAUAUCUGUUUUC </pre>                         |         |      |
| <a href="#">hsa-miR-570 (3' ... 5')</a>      | <pre>           CGUUUCCAUAACGACAAAAGC </pre>                        | 7mer-m8 | 3218 |
| <a href="#">hsa circ 0059354 (5' ... 3')</a> | <pre>           UGGAAGGAAUGUCUCAAGAAAC </pre>                       |         |      |
| <a href="#">hsa-miR-578 (3' ... 5')</a>      | <pre>           UGUUAGGAUCUCGUGUUCUUC </pre>                        | 7mer-1a | 1036 |
| <a href="#">hsa circ 0059354 (5' ... 3')</a> | <pre>           UUAGUCACCCAUCUGCAAGAAA </pre>                       |         |      |
| <a href="#">hsa-miR-578 (3' ... 5')</a>      | <pre>           UGUUAGGAUCUCGUGUUCUUC </pre>                        | 7mer-1a | 3035 |
| <a href="#">hsa circ 0059354 (5' ... 3')</a> | <pre>           UGCAAAAAGUCUCAACAAGAAG </pre>                       |         |      |
|                                              | <pre>                 </pre>                                        | 7mer-m8 | 3242 |



|                                              |                                    |         |      |
|----------------------------------------------|------------------------------------|---------|------|
| <a href="#">hsa-miR-578 (3' ... 5')</a>      | UGUUAGGAUCUCGUGUUCUUC              |         |      |
| <a href="#">hsa_circ_0059354 (5' ... 3')</a> | CUGUAUUUAACUGAGCACAAGAU<br><br>    | 7mer-1a | 4069 |
| <a href="#">hsa-miR-581 (3' ... 5')</a>      | UGACUAGAUCUCUUGUGUUCU              |         |      |
| <a href="#">hsa_circ_0059354 (5' ... 3')</a> | AUUC CAGGCAACCAGCACAAGAG<br><br>   | 7mer-1a | 501  |
| <a href="#">hsa-miR-581 (3' ... 5')</a>      | UGACUAGAUCUCUUGUGUUCU              |         |      |
| <a href="#">hsa_circ_0059354 (5' ... 3')</a> | UGUAAAGGACAAAAGACCAGUUU<br><br>    | 7mer-m8 | 2674 |
| <a href="#">hsa-miR-582-3p (3' ... 5')</a>   | CCAAGUCAACAAGUUGGUCAAU             |         |      |
| <a href="#">hsa_circ_0059354 (5' ... 3')</a> | UGGGGUUCAGGGAAG---CUCUUUAG<br><br> | 7mer-1a | 1349 |
| <a href="#">hsa-miR-583 (3' ... 5')</a>      | CAUUACCCUGGAAGGAGAAAC              |         |      |
| <a href="#">hsa_circ_0059354 (5' ... 3')</a> | UAAGAAAAGGGAUU--CUCUUUAA           |         |      |

|                                              |                                                    |         |      |
|----------------------------------------------|----------------------------------------------------|---------|------|
| <a href="#">hsa-miR-583 (3' ... 5')</a>      | <pre>              CAUUACCCUGGAAGGAGAAAC </pre>    | 7mer-1a | 3340 |
| <a href="#">hsa circ 0059354 (5' ... 3')</a> | <pre> AGGAGACAGGAGAUCACCAUAAG </pre>               |         |      |
| <a href="#">hsa-miR-584 (3' ... 5')</a>      | <pre>              GAGUCAGGGUCCGUU--UGGUAAU </pre> | 7mer-1a | 3847 |
| <a href="#">hsa circ 0059354 (5' ... 3')</a> | <pre> AUUUUGAUUUGUUUUAAUGCAUC </pre>               |         |      |
| <a href="#">hsa-miR-586 (3' ... 5')</a>      | <pre>       CCUGGAUUUUUAUGUUACGUAU </pre>          | 7mer-m8 | 4371 |
| <a href="#">hsa circ 0059354 (5' ... 3')</a> | <pre> AGGCACUUUCUUUCAUGGAAAC </pre>                |         |      |
| <a href="#">hsa-miR-587 (3' ... 5')</a>      | <pre>       CACUGAGUAGUGGAUACCUUU </pre>           | 7mer-1a | 250  |
| <a href="#">hsa circ 0059354 (5' ... 3')</a> | <pre> CUUGCGGCAAGUCUGAUGGAAAG </pre>               |         |      |
| <a href="#">hsa-miR-587 (3' ... 5')</a>      | <pre>       CACUGAGUAGUGGAUACCUUU </pre>           | 7mer-1a | 785  |
| <a href="#">hsa circ 0059354 (5' ... 3')</a> | <pre> UUAGAGAGGGAAGAGGGUUCUCC </pre>               |         |      |

|                                              |                                                                              |         |      |
|----------------------------------------------|------------------------------------------------------------------------------|---------|------|
| <a href="#">hsa-miR-589 (3' ... 5')</a>      | <pre>         GAGUCUCGUCUGCACCAAGAGU </pre>                                  | 7mer-m8 | 653  |
| <a href="#">hsa_circ_0059354 (5' ... 3')</a> | <pre> UUCUCACUGGUAUCACAUGGUCU         UGUUACUCUUGGGUACCAGA </pre>            | 7mer-m8 | 2584 |
| <a href="#">hsa-miR-591 (3' ... 5')</a>      | <pre> CCAUGGAAACAUUUAGACACAAA         CAAACUAAUUUGACUGUGUUG </pre>           | 8mer-1a | 263  |
| <a href="#">hsa_circ_0059354 (5' ... 3')</a> | <pre> UAGCAGCAGUUGAAACAGAGACA         UCUUUGGGGUCGUCUCUGU </pre>             | 8mer-1a | 2537 |
| <a href="#">hsa-miR-593 (3' ... 5')</a>      | <pre> UCCCAUCUCACACAA---CACACUUC                UCUGUGUGGUGCCGUGUGAAG </pre> | 7mer-m8 | 2411 |
| <a href="#">hsa-miR-595 (3' ... 5')</a>      | <pre> CCACGUA AUGCAGACCACACUUU </pre>                                        |         |      |

|                                              |                                                                           |         |      |
|----------------------------------------------|---------------------------------------------------------------------------|---------|------|
| <a href="#">hsa-miR-595 (3' ... 5')</a>      | <pre>         UCUGUGUGGUGCCGUGUGAAG </pre>                                | 7mer-m8 | 2433 |
| <a href="#">hsa circ 0059354 (5' ... 3')</a> | <pre> UACAGCGGCCAAACCAUGACGUG         ACUGCUACUGUUGCUACUGCAU </pre>       | 7mer-m8 | 3813 |
| <a href="#">hsa-miR-598 (3' ... 5')</a>      | <pre> AGAAGGAUCAGUGAAUGUAAGAG         CUCGUUCCGAGAACAGACAUUCA </pre>      | 7mer-1a | 729  |
| <a href="#">hsa circ 0059354 (5' ... 3')</a> | <pre> GACAGGUGCCUUGAA---CGCAGCCC               CAGGACUUAAGGCGUCGGA </pre> | 7mer-m8 | 1173 |
| <a href="#">hsa-miR-604 (3' ... 5')</a>      | <pre> CCUCAGCUCUCUGAGCAGCCAC         CAGGACUUAAGGCGUCGGA </pre>           | 7mer-1a | 1410 |
| <a href="#">hsa circ 0059354 (5' ... 3')</a> | <pre> CUCAAGUGCCAGGGAGCAGCCAC </pre>                                      |         |      |

|                                              |                           |         |      |
|----------------------------------------------|---------------------------|---------|------|
| <a href="#">hsa-miR-604 (3' ... 5')</a>      | <br>CAGGACUUAAGGCGUCGGA   | 7mer-1a | 616  |
| <a href="#">hsa_circ_0059354 (5' ... 3')</a> | AUUUUGGAAGGGUUCUUUGAAAU   |         |      |
| <a href="#">hsa-miR-607 (3' ... 5')</a>      | <br>CAAUAUCUAGACCUAAACUUG | 7mer-1a | 2515 |
| <a href="#">hsa_circ_0059354 (5' ... 3')</a> | GGAGGAGAUAGCCGAGACCCAG    |         |      |
| <a href="#">hsa-miR-615-5p (3' ... 5')</a>   | <br>CUAGGCUCGUGGCCCCUGGGG | 7mer-1a | 150  |
| <a href="#">hsa_circ_0059354 (5' ... 3')</a> | CAGCUCUUAUCCUGGACCCU      |         |      |
| <a href="#">hsa-miR-615-5p (3' ... 5')</a>   | <br>CUAGGCUCGUGGCCCCUGGGG | 7mer-m8 | 347  |
| <a href="#">hsa_circ_0059354 (5' ... 3')</a> | ACGUUGAUUGUUUAAAUGACAA    |         |      |
| <a href="#">hsa-miR-616 (3' ... 5')</a>      | <br>GACGAGUUUGGAGGUUACUGA | 7mer-1a | 866  |
| <a href="#">hsa_circ_0059354 (5' ... 3')</a> | GAGGGAAGAGGGUUCUCCAGGUU   |         |      |

|                                              |                                               |         |      |
|----------------------------------------------|-----------------------------------------------|---------|------|
| <a href="#">hsa-miR-619 (3' ... 5')</a>      | <pre>         UGACCCGUGUUUGUACAGGUCCAG </pre> | 7mer-m8 | 658  |
| <a href="#">hsa circ 0059354 (5' ... 3')</a> | <pre> UUUCUGGUGUGUAAUUGCUAGCG         </pre>  | 7mer-m8 | 4170 |
| <a href="#">hsa-miR-621 (3' ... 5')</a>      | <pre> UCCAUUCGCGACAACGAUCGG </pre>            |         |      |
| <a href="#">hsa circ 0059354 (5' ... 3')</a> | <pre> GGAAGUUUCAGGUUGAAGGGAAA         </pre>  | 7mer-1a | 1128 |
| <a href="#">hsa-miR-623 (3' ... 5')</a>      | <pre> UGGGUUGUCGGGGACGUUCCUA </pre>           |         |      |
| <a href="#">hsa circ 0059354 (5' ... 3')</a> | <pre> GGCCAGAUCACUUCCAAGGGAG         </pre>   | 7mer-m8 | 2326 |
| <a href="#">hsa-miR-623 (3' ... 5')</a>      | <pre> UGGGUUGUCGGGGACGUUCCUA </pre>           |         |      |
| <a href="#">hsa circ 0059354 (5' ... 3')</a> | <pre> AAGCUCUCUUAAGAAAAGGGAAU         </pre>  | 7mer-1a | 3331 |
| <a href="#">hsa-miR-623 (3' ... 5')</a>      | <pre> UGGGUUGUCGGGGACGUUCCUA </pre>           |         |      |
| <a href="#">hsa circ 0059354 (5' ... 3')</a> | <pre> CUGACAGGGCCUCAGCAAGGGAG </pre>          |         |      |

|                                              |                                                                     |         |      |
|----------------------------------------------|---------------------------------------------------------------------|---------|------|
| <a href="#">hsa-miR-623 (3' ... 5')</a>      | <pre>                                UGGGUUGUCGGGGACGUUCCCUA </pre> | 7mer-m8 | 4331 |
| <a href="#">hsa circ 0059354 (5' ... 3')</a> | <pre>           UUGCAAGUUGCCUCACCUUGUG </pre>                       |         |      |
| <a href="#">hsa-miR-624 (3' ... 5')</a>      | <pre>                           UCCAUAUUGGUUAUGGAACAC </pre>        | 7mer-m8 | 1280 |
| <a href="#">hsa circ 0059354 (5' ... 3')</a> | <pre>           UCCUCCUCCAUAGG--GACAGCAG </pre>                     |         |      |
| <a href="#">hsa-miR-626 (3' ... 5')</a>      | <pre>                                UUCUGUAAAAGUCUGUCGA </pre>     | 7mer-1a | 1912 |
| <a href="#">hsa circ 0059354 (5' ... 3')</a> | <pre>           GAUGUAGAAGUCAGCAGACAGCU </pre>                      |         |      |
| <a href="#">hsa-miR-626 (3' ... 5')</a>      | <pre>                           UUCUGUAAAAGUCUGUCGA </pre>          | 7mer-m8 | 329  |
| <a href="#">hsa circ 0059354 (5' ... 3')</a> | <pre>           UGGGAUGGUGGAAU--AAGCACAA </pre>                     |         |      |
| <a href="#">hsa-miR-636 (3' ... 5')</a>      | <pre>                                ACGCCGCCUCGUCGUUCGUGU </pre>   | 7mer-1a | 2826 |
| <a href="#">hsa circ 0059354 (5' ... 3')</a> | <pre>           UGGGGAGAGGCUGAAAAGCACAA </pre>                      |         |      |

|                                              |                                                           |         |      |
|----------------------------------------------|-----------------------------------------------------------|---------|------|
| <a href="#">hsa-miR-636 (3' ... 5')</a>      | <pre>                  ACGCCCGCCCGUCUCG----UUCGUGU </pre> | 7mer-1a | 2917 |
| <a href="#">hsa_circ_0059354 (5' ... 3')</a> | <pre> CCAUUGCCCAUAAGACCCCCAGG </pre>                      |         |      |
| <a href="#">hsa-miR-637 (3' ... 5')</a>      | <pre>                  UGCGUCUCGGGCUUUC-GGGGGUCA </pre>   | 7mer-m8 | 222  |
| <a href="#">hsa_circ_0059354 (5' ... 3')</a> | <pre> GUGGAAGUGAGAGGAGAUCCCAU </pre>                      |         |      |
| <a href="#">hsa-miR-638 (3' ... 5')</a>      | <pre>       UCCGGCGGUGGGCGGGCGCUAGGGA </pre>              | 7mer-1a | 2394 |
| <a href="#">hsa_circ_0059354 (5' ... 3')</a> | <pre> AAGUGCCAGGGAGCAGCCACACG </pre>                      |         |      |
| <a href="#">hsa-miR-644 (3' ... 5')</a>      | <pre>       CGAGAUUCUUUCGGUGUGA </pre>                    | 7mer-m8 | 619  |
| <a href="#">hsa_circ_0059354 (5' ... 3')</a> | <pre> UAGCAGGCGUCUUUGAGCCUAGC </pre>                      |         |      |
| <a href="#">hsa-miR-645 (3' ... 5')</a>      | <pre>                  AGUCGUCAUGG-----UCGGAUCU </pre>    | 7mer-m8 | 1623 |
| <a href="#">hsa_circ_0059354 (5' ... 3')</a> | <pre> AAAUUCUCCUGUAUGCCUAGAA </pre>                       |         |      |



|                                              |                                              |         |      |
|----------------------------------------------|----------------------------------------------|---------|------|
| <a href="#">hsa-miR-645 (3' ... 5')</a>      | <pre>       AGUCGUCAUGGUCGGAUCU </pre>       | 7mer-1a | 710  |
| <a href="#">hsa_circ_0059354 (5' ... 3')</a> | <pre> CCUCAGCUCCUCUGAGCAGCCAC </pre>         |         |      |
| <a href="#">hsa-miR-647 (3' ... 5')</a>      | <pre>       CUUCCUUCACUCACGUCGGUG </pre>     | 7mer-m8 | 1410 |
| <a href="#">hsa_circ_0059354 (5' ... 3')</a> | <pre> GUGAGCCACUGUGCCCAGCCAAA </pre>         |         |      |
| <a href="#">hsa-miR-647 (3' ... 5')</a>      | <pre>       CUUCCUUCACUCACGUCGGUG </pre>     | 7mer-1a | 3752 |
| <a href="#">hsa_circ_0059354 (5' ... 3')</a> | <pre> CUCAAGUGCCAGGGAGCAGCCAC </pre>         |         |      |
| <a href="#">hsa-miR-647 (3' ... 5')</a>      | <pre>       CUUCCUUCACUCA----CGUCGGUG </pre> | 7mer-m8 | 616  |
| <a href="#">hsa_circ_0059354 (5' ... 3')</a> | <pre> AGGUAAACACAUUUUAUCCUAAU </pre>         |         |      |
| <a href="#">hsa-miR-651 (3' ... 5')</a>      | <pre>       GUUUUCAGUUCGAAUAGGAUUU </pre>    | 7mer-m8 | 3177 |

|                                              |                                  |         |      |
|----------------------------------------------|----------------------------------|---------|------|
| <a href="#">hsa_circ_0059354 (5' ... 3')</a> | CCAUGCAGAAAAAGUCUCAACAAG<br><br> | 7mer-1a | 3239 |
| <a href="#">hsa-miR-653 (3' ... 5')</a>      | GUCAUCUCUAACAAAGUUGUG            |         |      |
| <a href="#">hsa_circ_0059354 (5' ... 3')</a> | UGUUUAAAUGACAA--AGACAUAU<br><br> | 7mer-1a | 874  |
| <a href="#">hsa-miR-654-3p (3' ... 5')</a>   | UUCCACUACCAGUCGUCUGUUAU          |         |      |
| <a href="#">hsa_circ_0059354 (5' ... 3')</a> | GGAAAUGUCGAGGCUACCUGCAG<br><br>  | 7mer-1a | 1146 |
| <a href="#">hsa-miR-657 (3' ... 5')</a>      | GGAUCUCUCCACUCUUGGACGG           |         |      |
| <a href="#">hsa_circ_0059354 (5' ... 3')</a> | CACCAACAACAAAACAACCAAAA<br><br>  | 7mer-1a | 3372 |
| <a href="#">hsa-miR-659 (3' ... 5')</a>      | ACCCUGGGAGGGACUUGGUUC            |         |      |
| <a href="#">hsa_circ_0059354 (5' ... 3')</a> | AGUCUGGUUCUGUUUCCAGGCU<br><br>   | 7mer-m8 | 3495 |
| <a href="#">hsa-miR-661 (3' ... 5')</a>      | UGCGGUCGGUCUCUGGGUCCGU           |         |      |

|                                              |                                 |         |      |
|----------------------------------------------|---------------------------------|---------|------|
| <a href="#">hsa_circ_0059354 (5' ... 3')</a> | ACAUGUAAUUAUUCCAGGCAA<br><br>   | 7mer-1a | 489  |
| <a href="#">hsa-miR-661 (3' ... 5')</a>      | UGC GCGUCCGGUCUCUGGGUCCGU       |         |      |
| <a href="#">hsa_circ_0059354 (5' ... 3')</a> | GAGAGUGAAGAAUUGGCCACAG<br><br>  | 7mer-1a | 3299 |
| <a href="#">hsa-miR-663b (3' ... 5')</a>     | GGAGUCCGUGCCGCCCGGUGG           |         |      |
| <a href="#">hsa_circ_0059354 (5' ... 3')</a> | GUAGCCACCGGGAGAGGCUUCCU<br><br> | 7mer-m8 | 2014 |
| <a href="#">hsa-miR-671-5p (3' ... 5')</a>   | GAGGUCGGGAGGUCCGAAGGA           |         |      |
| <a href="#">hsa_circ_0059354 (5' ... 3')</a> | UGUGAAGAGUGGAUUCUGCCUCC<br><br> | 7mer-m8 | 918  |
| <a href="#">hsa-miR-1827 (3' ... 5')</a>     | UAAGUUAGAUGACGGAGU              |         |      |
| <a href="#">hsa_circ_0059354 (5' ... 3')</a> | AUUCUGCCUCCAUCUCUGCCUCC<br><br> | 7mer-m8 | 930  |

|                                              |                         |  |         |
|----------------------------------------------|-------------------------|--|---------|
| <a href="#">hsa-miR-1827 (3' ... 5')</a>     | UAAGUUAGAUGACGGAGU      |  |         |
| <a href="#">hsa_circ_0059354 (5' ... 3')</a> | AAUGAUUCGACAGAGGCUGGAGG |  | 7mer-m8 |
| <a href="#">hsa-miR-766 (3' ... 5')</a>      | CGACUCCGACACCCCGACCUCA  |  | 132     |
| <a href="#">hsa_circ_0059354 (5' ... 3')</a> | GGUUCUGUUUCCAGGCUGGAGU  |  | 7mer-m8 |
| <a href="#">hsa-miR-766 (3' ... 5')</a>      | CGACUCCGACACCCCGACCUCA  |  | 3500    |
| <a href="#">hsa_circ_0059354 (5' ... 3')</a> | UCUCCUCAGCUCCUCUGAGCAGC |  | 7mer-m8 |
| <a href="#">hsa-miR-767-3p (3' ... 5')</a>   | UCUUUGGUACCCCAUACUCGUCU |  | 1407    |
| <a href="#">hsa_circ_0059354 (5' ... 3')</a> | CUUUGCCACAGUGUGGAGCAGAU |  | 7mer-1a |
| <a href="#">hsa-miR-767-3p (3' ... 5')</a>   | UCUUUGGUACCCCAUACUCGUCU |  | 2560    |
| <a href="#">hsa_circ_0059354 (5' ... 3')</a> | CACAUGUGCUGCUCGUGAGCAGG |  |         |

|                                              |                                                                          |         |      |
|----------------------------------------------|--------------------------------------------------------------------------|---------|------|
| <a href="#">hsa-miR-767-3p (3' ... 5')</a>   | <pre>         UCUUUGGUACCCCAUACUCGUCU </pre>                             | 7mer-m8 | 536  |
| <a href="#">hsa circ 0059354 (5' ... 3')</a> | <pre> UUCAUGUCAUCAAGGUCUCCU             UGUUGUUUUAGUGAUCAGAAGGU </pre>   | 7mer-m8 | 1199 |
| <a href="#">hsa-miR-7 (3' ... 5')</a>        | <pre> AAAGCACAAAAGUA--GUCUCCC             UGUUGUUUUAGUGAUCAGAAGGU </pre> | 7mer-m8 | 2931 |
| <a href="#">hsa circ 0059354 (5' ... 3')</a> | <pre> AAUGUGGCGCCCCUUCUCCAG       UGUUGUUUUAGUGAUCAGAAGGU </pre>         | 7mer-1a | 3986 |
| <a href="#">hsa-miR-7 (3' ... 5')</a>        | <pre> CAGUUUACCUUGGAGUCUCCC         UGUUGUUUUAGUGAUCAGAAGGU </pre>       | 7mer-m8 | 4116 |
| <a href="#">hsa circ 0059354 (5' ... 3')</a> | <pre> CCCCA AUGGAGAAAAGGCAAG </pre>                                      |         |      |

|                                              |                                                    |         |      |
|----------------------------------------------|----------------------------------------------------|---------|------|
| <a href="#">hsa-miR-874 (3' ... 5')</a>      | <pre>       AGCCAGGGAGCCCGGUCCCGUC </pre>          | 7mer-1a | 1454 |
| <a href="#">hsa_circ_0059354 (5' ... 3')</a> | <pre> AAUUCUCUUUAAAGAAACCACCA </pre>               |         |      |
| <a href="#">hsa-miR-876-3p (3' ... 5')</a>   | <pre>             ACUUA AUGAAACAU--UUGGUGGU </pre> | 8mer-1a | 3351 |
| <a href="#">hsa_circ_0059354 (5' ... 3')</a> | <pre> CUCUUUAAAGAAACCACCACCAA </pre>               |         |      |
| <a href="#">hsa-miR-876-3p (3' ... 5')</a>   | <pre>       ACUUA AUGAAACAUUUGGUGGU </pre>         | 7mer-1a | 3355 |
| <a href="#">hsa_circ_0059354 (5' ... 3')</a> | <pre> AUCUCGCGUGGCGUACACAGUG </pre>                |         |      |
| <a href="#">hsa-miR-892a (3' ... 5')</a>     | <pre>       GAUGCGUCUUUCCUGUGUCAC </pre>           | 7mer-m8 | 1063 |
| <a href="#">hsa_circ_0059354 (5' ... 3')</a> | <pre> GCAAGAGGAUUUCUGGAUAAUAG </pre>               |         |      |
| <a href="#">hsa-miR-889 (3' ... 5')</a>      | <pre>       UGUUACCAACAGGCUAUAAUU </pre>           | 7mer-m8 | 3016 |

|                                              |                                 |         |      |
|----------------------------------------------|---------------------------------|---------|------|
| <a href="#">hsa_circ_0059354 (5' ... 3')</a> | UCCUGUCUCAGCCUCCCAAGUAG<br><br> | 7mer-1a | 3578 |
| <a href="#">hsa-miR-890 (3' ... 5')</a>      | GUUGACUACGGAAAGGUUCAU           |         |      |
| <a href="#">hsa_circ_0059354 (5' ... 3')</a> | CCUCUGGGUUCUUGCAAGUUGCC<br><br> | 7mer-m8 | 1269 |
| <a href="#">hsa-miR-891b (3' ... 5')</a>     | AGUUACUGAGUCCAUAACGU            |         |      |
| <a href="#">hsa_circ_0059354 (5' ... 3')</a> | GAGCGAUACUAAGGCAGACUCAG<br><br> | 7mer-1a | 2346 |
| <a href="#">hsa-miR-924 (3' ... 5')</a>      | CGUUCUGUAGUGUUCUGAGA            |         |      |
| <a href="#">hsa_circ_0059354 (5' ... 3')</a> | UGUUUUAACUGUAUUUAACUGAG<br><br> | 7mer-1a | 4061 |
| <a href="#">hsa-miR-935 (3' ... 5')</a>      | CGCCAUCGCCUUCGCCAUUGACC         |         |      |
| <a href="#">hsa_circ_0059354 (5' ... 3')</a> | UGAAGCCUCAUCUUGCUACUGAG<br><br> | 7mer-1a | 1324 |
| <a href="#">hsa-miR-936 (3' ... 5')</a>      | GACGCUAAGGAGGGAGAUGACA          |         |      |

|                                                                                                    |                                                                             |                |             |
|----------------------------------------------------------------------------------------------------|-----------------------------------------------------------------------------|----------------|-------------|
| <p><a href="#">hsa_circ_0059354 (5' ... 3')</a></p> <p><a href="#">hsa-miR-938 (3' ... 5')</a></p> | <p>ACCCCAAUGGGAGAAAAGGGCAA</p> <p>     </p> <p>UGACCCAAGUGGAAAUCCCGU</p>    | <p>7mer-1a</p> | <p>1453</p> |
| <p><a href="#">hsa_circ_0059354 (5' ... 3')</a></p> <p><a href="#">hsa-miR-942 (3' ... 5')</a></p> | <p>CCUUGGAGGACUUGGGAGAAGAA</p> <p>     </p> <p>GUGUACCGUUUUUGUCUCUUCU</p>   | <p>7mer-1a</p> | <p>2175</p> |
| <p><a href="#">hsa_circ_0059354 (5' ... 3')</a></p> <p><a href="#">hsa-miR-942 (3' ... 5')</a></p> | <p>CUACCUUUAGGAGACAGAGAAGA</p> <p>       </p> <p>GUGUACCGUUUUUGUCUCUUCU</p> | <p>8mer-1a</p> | <p>957</p>  |



ditions

| CircRN<br>A End | 3'<br>pairing | local<br>AU | position | TA     | SPS    | context<br>+ score | context<br>+ score<br>percent<br>ile |
|-----------------|---------------|-------------|----------|--------|--------|--------------------|--------------------------------------|
| 541             | 0.04          | 0.059       | 0.014    | -0.001 | -0.038 | -0.046             | 61                                   |
| 1154            | 0.001         | 0.003       | 0.076    | 0.027  | -0.037 | -0.004             | 47                                   |
| 1847            | 0.004         | 0.019       | 0.114    | 0.027  | -0.037 | 0.053              | 18                                   |
| 4129            | 0.001         | 0.024       | -0.018   | 0.027  | -0.037 | -0.077             | 68                                   |

|      |       |        |        |        |        |        |    |
|------|-------|--------|--------|--------|--------|--------|----|
| 1493 | 0.001 | 0.046  | 0.113  | 0.022  | -0.034 | 0.074  | 13 |
| 114  | 0.003 | -0.006 | -0.047 | -0.066 | -0.101 | -0.337 | 90 |
| 285  | 0.003 | 0.034  | -0.022 | -0.066 | -0.101 | -0.272 | 83 |
| 1154 | 0.003 | -0.007 | 0.176  | 0.046  | -0.112 | -0.141 | 87 |
| 1847 | 0.001 | 0.019  | 0.114  | 0.028  | -0.037 | 0.051  | 23 |

|      |        |       |        |        |        |        |    |
|------|--------|-------|--------|--------|--------|--------|----|
| 4129 | 0.003  | 0.051 | -0.041 | 0.046  | -0.112 | -0.3   | 97 |
| 3780 | -0.008 | -0.03 | 0.047  | -0.005 | 0.041  | -0.202 | 96 |
| 3519 | -0.009 | 0.037 | 0.048  | 0.023  | -0.1   | -0.075 | 77 |
| 3650 | 0.003  | 0.001 | 0.047  | 0.023  | -0.079 | -0.125 | 87 |
| 4094 | 0.001  | 0.015 | -0.015 | 0.023  | -0.1   | -0.15  | 91 |

|      |        |       |       |        |        |        |    |
|------|--------|-------|-------|--------|--------|--------|----|
|      |        |       |       |        |        |        |    |
| 987  | 0.012  | 0.021 | 0.077 | -0.028 | -0.04  | -0.078 | 60 |
| 524  | 0.004  | 0.043 | 0.007 | 0.001  | -0.067 | -0.086 | 66 |
| 3136 | 0.004  | 0.021 | 0.09  | 0.022  | 0      | 0.063  | 23 |
| 652  | -0.016 | 0.048 | 0.03  | 0.022  | -0.02  | -0.056 | 70 |
|      |        |       |       |        |        |        |    |

|      |        |       |       |        |        |        |    |
|------|--------|-------|-------|--------|--------|--------|----|
| 1705 | -0.009 | 0.048 | 0.114 | 0.009  | -0.017 | 0.071  | 5  |
| 2203 | -0.039 | 0.008 | 0.265 | -0.033 | 0.072  | 0.026  | 38 |
| 2322 | -0.025 | 0.008 | 0.151 | -0.014 | 0.008  | 0.008  | 64 |
| 720  | 0.001  | 0.015 | 0.028 | 0.017  | -0.011 | -0.024 | 65 |
| 3954 | 0.001  | -0.03 | 0.001 | -0.015 | -0.003 | -0.12  | 84 |

|      |        |       |        |        |        |        |    |
|------|--------|-------|--------|--------|--------|--------|----|
|      |        |       |        |        |        |        |    |
| 1659 | -0.016 | 0.06  | 0.151  | 0.021  | 0.01   | 0.106  | 10 |
| 3093 | 0.001  | 0.011 | 0.095  | -0.004 | -0.015 | 0.014  | 42 |
| 46   | 0.012  | -0.06 | -0.056 | -0.004 | 0.002  | -0.226 | 96 |
| 1355 | 0.003  | 0.062 | 0.226  | 0.022  | 0.023  | 0.089  | 24 |
|      |        |       |        |        |        |        |    |

|      |        |        |        |        |        |        |    |
|------|--------|--------|--------|--------|--------|--------|----|
| 3346 | 0.008  | -0.017 | 0.067  | 0.013  | 0.042  | 0.039  | 56 |
| 3144 | 0.003  | -0.019 | 0.119  | -0.024 | 0.012  | -0.029 | 58 |
| 3519 | -0.006 | 0.037  | 0.048  | 0.004  | -0.1   | -0.091 | 78 |
| 4094 | 0.008  | 0.015  | -0.015 | 0.004  | -0.1   | -0.162 | 89 |
| 1209 | -0.009 | 0.029  | 0.082  | 0.009  | -0.069 | -0.032 | 45 |

|      |        |        |        |        |        |        |    |
|------|--------|--------|--------|--------|--------|--------|----|
| 2455 | -0.016 | -0.029 | 0.151  | 0.009  | -0.073 | -0.078 | 63 |
| 1484 | 0.012  | 0.03   | 0.147  | -0.009 | -0.075 | -0.015 | 20 |
| 1437 | -0.013 | 0.012  | 0.107  | 0.01   | 0.038  | 0.08   | 42 |
| 1312 | 0.001  | 0.033  | 0.093  | -0.003 | 0.032  | 0.082  | 14 |
| 3972 | 0.001  | -0.009 | -0.001 | -0.003 | 0.032  | -0.054 | 83 |



|      |       |       |        |        |        |        |    |
|------|-------|-------|--------|--------|--------|--------|----|
|      |       |       |        |        |        |        |    |
| 3994 | 0.04  | 0.016 | -0.002 | 0.02   | -0.001 | -0.047 | 69 |
| 2536 | 0.003 | 0.003 | 0.151  | 0.038  | 0.069  | 0.144  | 30 |
| 151  | 0.001 | 0.035 | -0.034 | -0.052 | -0.085 | -0.209 | 88 |
| 3442 | 0.003 | -0.03 | 0.133  | -0.083 | -0.14  | -0.364 | 98 |
|      |       |       |        |        |        |        |    |

|      |       |        |        |       |        |        |    |
|------|-------|--------|--------|-------|--------|--------|----|
| 634  | 0.003 | 0.01   | 0.027  | 0.016 | -0.018 | -0.082 | 82 |
| 1579 | 0.008 | 0.038  | 0.114  | 0.008 | -0.016 | 0.078  | 11 |
| 1829 | 0.003 | 0.021  | 0.151  | 0.009 | -0.032 | 0.032  | 25 |
| 4090 | 0.021 | 0.044  | -0.015 | 0.009 | -0.032 | -0.093 | 80 |
| 850  | 0.011 | -0.026 | 0.042  | 0.008 | -0.031 | -0.07  | 68 |
|      |       |        |        |       |        |        |    |

|      |        |        |        |       |        |        |    |
|------|--------|--------|--------|-------|--------|--------|----|
| 4325 | 0.003  | 0.017  | -0.049 | 0.009 | -0.083 | -0.223 | 94 |
| 849  | 0.015  | -0.029 | 0.042  | 0.005 | -0.047 | -0.088 | 67 |
| 1249 | -0.016 | 0.078  | 0.114  | 0.042 | 0.104  | 0.202  | 12 |
| 2624 | -0.016 | -0.053 | 0.151  | 0.012 | -0.05  | -0.076 | 68 |
| 4095 | 0.001  | 0.013  | -0.015 | 0.012 | -0.069 | -0.132 | 81 |
|      |        |        |        |       |        |        |    |

|      |        |       |       |       |        |        |    |
|------|--------|-------|-------|-------|--------|--------|----|
| 2029 | 0.001  | 0.037 | 0.114 | 0     | 0.031  | 0.109  | 5  |
| 2772 | -0.006 | 0.03  | 0.114 | 0     | 0.031  | 0.095  | 9  |
| 1369 | 0.001  | 0.055 | 0.099 | 0.01  | -0.032 | 0.059  | 5  |
| 2954 | 0.001  | 0.015 | 0.11  | 0.01  | -0.032 | 0.03   | 30 |
| 2224 | -0.002 | 0.011 | 0.114 | 0.001 | -0.052 | -0.002 | 32 |
|      |        |       |       |       |        |        |    |

|      |        |        |        |        |        |        |    |
|------|--------|--------|--------|--------|--------|--------|----|
| 2877 | -0.006 | 0.025  | 0.114  | 0.005  | 0.022  | 0.086  | 13 |
| 4385 | 0.001  | -0.023 | -0.046 | 0.005  | 0.022  | -0.115 | 90 |
| 2270 | 0.008  | 0.018  | 0.114  | -0.005 | -0.029 | 0.032  | 23 |
| 4407 | -0.007 | -0.113 | -0.06  | -0.006 | 0.004  | -0.302 | 98 |
| 1799 | 0.003  | 0.063  | 0.151  | -0.024 | 0.038  | 0.111  | 0  |

|      |        |        |        |        |        |        |    |
|------|--------|--------|--------|--------|--------|--------|----|
| 2463 | -0.006 | 0.034  | 0.114  | 0.005  | 0.005  | 0.078  | 16 |
| 2349 | 0.012  | -0.043 | 0.151  | -0.01  | -0.073 | -0.083 | 53 |
| 333  | 0.004  | 0.046  | -0.014 | -0.01  | -0.056 | -0.104 | 60 |
| 544  | 0.004  | 0.01   | 0.009  | 0.02   | -0.063 | -0.094 | 70 |
| 2496 | 0.004  | -0.012 | 0.114  | -0.018 | -0.005 | 0.009  | 36 |

|      |        |       |        |        |        |          |    |
|------|--------|-------|--------|--------|--------|----------|----|
| 4035 | 0.001  | 0.06  | -0.008 | 0.015  | 0.021  | 0.015    | 62 |
| 1307 | -0.002 | 0.009 | 0.092  | 0.003  | -0.012 | 0.016    | 40 |
| 2400 | 0.003  | 0.008 | 0.151  | -0.011 | -0.04  | -0.009   | 39 |
| 2400 | 0.012  | 0.008 | 0.151  | -0.011 | -0.04  | 6.94E-18 | NA |
| 1786 | -0.007 | 0.071 | 0.151  | 0.029  | -0.115 | 0.009    | 13 |

|      |        |       |        |       |       |        |    |
|------|--------|-------|--------|-------|-------|--------|----|
|      |        |       |        |       |       |        |    |
| 4242 | 0.003  | 0.015 | -0.037 | 0.014 | 0.021 | -0.104 | 92 |
| 4158 | -0.044 | 0.053 | -0.025 | 0.025 | 0.065 | -0.046 | 90 |
| 2027 | 0.001  | 0.041 | 0.114  | 0.038 | 0.081 | 0.201  | 3  |
| 3233 | -0.002 | 0.004 | 0.08   | 0.012 | 0.027 | 0.047  | 51 |
|      |        |       |        |       |       |        |    |



|      |        |        |       |       |        |        |    |
|------|--------|--------|-------|-------|--------|--------|----|
| 3233 | 0.004  | 0.004  | 0.08  | 0.012 | 0.027  | 0.053  | 49 |
| 2071 | -0.007 | -0.051 | 0.151 | 0.003 | -0.033 | -0.057 | 76 |
| 2503 | -0.016 | -0.014 | 0.151 | 0.043 | 0.12   | 0.164  | 61 |
| 3769 | -0.016 | -0.019 | 0.03  | 0.043 | 0.12   | 0.038  | 91 |
| 2053 | -0.006 | 0.004  | 0.114 | 0.022 | -0.015 | 0.045  | 30 |

|      |        |        |        |        |        |        |    |
|------|--------|--------|--------|--------|--------|--------|----|
| 908  | 0.003  | -0.006 | 0.113  | 0.037  | -0.063 | -0.163 | 93 |
| 1645 | 0.012  | 0.085  | 0.151  | -0.018 | -0.047 | 0.063  | 4  |
| 1645 | 0.003  | 0.085  | 0.151  | -0.018 | -0.047 | 0.054  | 7  |
| 241  | -0.016 | -0.021 | -0.029 | -0.018 | -0.047 | -0.251 | 95 |
| 241  | 0.003  | -0.021 | -0.029 | -0.018 | -0.047 | -0.232 | 94 |

|      |        |        |       |       |        |       |    |
|------|--------|--------|-------|-------|--------|-------|----|
|      |        |        |       |       |        |       |    |
| 2099 | 0.024  | -0.046 | 0.265 | 0.039 | -0.007 | 0.028 | 34 |
| 2078 | 0.004  | 0.002  | 0.114 | 0.022 | 0.027  | 0.095 | 22 |
| 2078 | 0.004  | 0.002  | 0.114 | 0.022 | 0.027  | 0.095 | 22 |
| 2549 | -0.007 | 0.009  | 0.151 | 0.029 | 0.039  | 0.101 | 57 |
| 2549 | -0.007 | 0.009  | 0.151 | 0.029 | 0.039  | 0.101 | 57 |

|      |        |        |       |        |        |        |    |
|------|--------|--------|-------|--------|--------|--------|----|
|      |        |        |       |        |        |        |    |
| 1063 | 0.001  | 0.029  | 0.066 | -0.091 | -0.049 | -0.118 | 50 |
| 1041 | 0.003  | -0.012 | 0.147 | 0.007  | 0.019  | -0.083 | 82 |
| 1451 | 0.001  | 0.011  | 0.108 | 0.023  | -0.065 | 0.004  | 40 |
| 2178 | -0.016 | 0.011  | 0.114 | 0.023  | -0.065 | -0.007 | 47 |
|      |        |        |       |        |        |        |    |

|      |        |        |       |       |        |       |    |
|------|--------|--------|-------|-------|--------|-------|----|
| 2625 | 0.003  | -0.088 | 0.151 | 0.023 | -0.069 | -0.1  | 80 |
| 1681 | -0.007 | 0.023  | 0.151 | 0.025 | 0.065  | 0.137 | 22 |
| 2131 | 0.021  | -0.042 | 0.151 | 0.025 | 0.065  | 0.1   | 54 |
| 1266 | -0.025 | 0.055  | 0.117 | 0     | 0.018  | 0.045 | 47 |
| 2516 | 0.012  | -0.015 | 0.151 | 0     | 0.018  | 0.046 | 46 |

|      |        |        |        |       |       |       |    |
|------|--------|--------|--------|-------|-------|-------|----|
| 2120 | 0.008  | -0.01  | 0.114  | 0.073 | 0.134 | 0.245 | 27 |
| 842  | -0.002 | 0.035  | 0.041  | 0.073 | 0.134 | 0.207 | 59 |
| 2682 | -0.013 | -0.013 | 0.114  | 0.017 | 0.044 | 0.075 | 47 |
| 2722 | 0.001  | 0.016  | 0.114  | 0.017 | 0.044 | 0.118 | 19 |
| 4107 | 0.001  | 0.048  | -0.016 | 0.017 | 0.044 | 0.02  | 71 |

|      |        |       |        |       |       |        |    |
|------|--------|-------|--------|-------|-------|--------|----|
|      |        |       |        |       |       |        |    |
| 472  | -0.007 | 0.03  | 0.004  | 0.021 | 0.098 | 0.026  | 84 |
| 4112 | -0.035 | 0.019 | -0.018 | 0.007 | 0.05  | -0.097 | 92 |
| 950  | -0.018 | 0.111 | 0.124  | 0.013 | 0.076 | 0.059  | 44 |
| 303  | 0.004  | 0.052 | -0.018 | 0.03  | 0.027 | 0.021  | 78 |
|      |        |       |        |       |       |        |    |

|      |        |        |       |        |        |       |    |
|------|--------|--------|-------|--------|--------|-------|----|
| 3529 | -0.006 | 0.045  | 0.047 | 0.01   | -0.052 | -0.03 | 54 |
| 751  | 0.001  | -0.009 | 0.031 | -0.006 | 0.085  | 0.028 | 77 |
| 3224 | -0.007 | -0.007 | 0.107 | 0.041  | 0.069  | 0.083 | 66 |
| 1042 | 0.008  | 0.021  | 0.063 | 0.017  | 0.042  | 0.077 | 42 |
| 3041 | 0.001  | 0      | 0.101 | 0.017  | 0.042  | 0.087 | 35 |
| 3248 | 0.012  | -0.018 | 0.104 | 0.017  | 0.053  | 0.048 | 57 |



|      |        |        |        |        |       |        |    |
|------|--------|--------|--------|--------|-------|--------|----|
|      |        |        |        |        |       |        |    |
| 4075 | 0.001  | 0.002  | -0.012 | -0.01  | 0.007 | -0.086 | 80 |
| 507  | 0.008  | 0.038  | 0.005  | -0.01  | 0.007 | -0.026 | 65 |
| 2680 | 0.012  | -0.037 | 0.151  | -0.009 | 0.004 | 0.001  | 47 |
| 1355 | -0.009 | 0.045  | 0.098  | 0.022  | 0.042 | 0.124  | 10 |
|      |        |        |        |        |       |        |    |

|      |        |        |        |        |       |        |    |
|------|--------|--------|--------|--------|-------|--------|----|
| 3346 | -0.013 | -0.017 | 0.067  | 0.022  | 0.042 | 0.027  | 68 |
| 3853 | -0.006 | 0.025  | 0.012  | -0.019 | 0.014 | -0.048 | 80 |
| 4377 | 0.012  | -0.08  | -0.056 | 0.005  | 0.05  | -0.189 | 97 |
| 256  | 0.001  | 0.014  | -0.023 | 0.023  | 0.021 | -0.038 | 78 |
| 791  | 0.001  | 0.004  | 0.036  | 0.023  | 0.021 | 0.011  | 68 |
|      |        |        |        |        |       |        |    |

|      |        |        |        |        |        |        |    |
|------|--------|--------|--------|--------|--------|--------|----|
| 659  | -0.007 | 0.035  | 0.031  | -0.004 | -0.023 | -0.088 | 83 |
| 2590 | 0.003  | -0.041 | 0.151  | -0.021 | -0.022 | -0.05  | 56 |
| 270  | 0.003  | 0.009  | -0.048 | 0.01   | 0.016  | -0.257 | 98 |
| 2544 | 0.024  | -0.02  | 0.265  | 0.023  | -0.045 | 0      | 64 |
| 2417 | -0.025 | 0.002  | 0.151  | -0.005 | 0.02   | 0.023  | 57 |
|      |        |        |        |        |        |        |    |

|      |        |       |       |        |        |        |    |
|------|--------|-------|-------|--------|--------|--------|----|
| 2439 | 0.012  | 0.012 | 0.151 | -0.005 | 0.02   | 0.07   | 22 |
| 3819 | 0.003  | 0.037 | 0.023 | -0.089 | 0.014  | -0.132 | 63 |
| 735  | -0.002 | 0.017 | 0.03  | 0.001  | 0.035  | 0.007  | 71 |
| 1179 | -0.016 | -0.03 | 0.104 | -0.003 | -0.099 | -0.164 | 77 |
| 1416 | -0.002 | 0.033 | 0.104 | -0.002 | -0.104 | -0.045 | 29 |
|      |        |       |       |        |        |        |    |

|      |        |        |        |        |        |        |    |
|------|--------|--------|--------|--------|--------|--------|----|
| 622  | 0.001  | 0.048  | 0.017  | -0.002 | -0.104 | -0.114 | 63 |
| 2521 | 0.001  | -0.003 | 0.114  | 0.051  | 0.078  | 0.167  | 34 |
| 156  | -0.002 | 0.049  | -0.034 | -0.002 | -0.105 | -0.168 | 70 |
| 353  | 0.012  | 0.029  | -0.013 | -0.002 | -0.121 | -0.215 | 82 |
| 872  | 0.011  | -0.033 | 0.045  | -0.003 | 0.034  | -0.02  | 72 |
|      |        |        |        |        |        |        |    |

|      |       |        |        |        |        |        |    |
|------|-------|--------|--------|--------|--------|--------|----|
| 664  | 0.012 | 0.021  | 0.031  | -0.006 | -0.049 | -0.111 | 76 |
| 4176 | 0.012 | -0.055 | -0.027 | -0.047 | -0.04  | -0.277 | 93 |
| 1134 | 0.001 | 0.008  | 0.073  | 0.014  | -0.028 | -0.006 | 59 |
| 2332 | 0.003 | 0.037  | 0.151  | 0.014  | -0.031 | 0.054  | 15 |
| 3337 | 0.004 | -0.016 | 0.068  | 0.014  | -0.028 | -0.032 | 69 |
|      |       |        |        |        |        |        |    |

|      |        |       |        |        |        |        |    |
|------|--------|-------|--------|--------|--------|--------|----|
| 4337 | -0.016 | 0.042 | -0.05  | 0.014  | -0.031 | -0.161 | 93 |
| 1286 | 0.012  | 0.058 | 0.119  | -0.004 | 0.004  | 0.069  | 16 |
| 1918 | -0.006 | 0.045 | 0.114  | -0.005 | -0.056 | 0.018  | 17 |
| 335  | 0.003  | 0.071 | -0.015 | -0.005 | -0.037 | -0.103 | 66 |
| 2832 | -0.006 | 0.009 | 0.114  | 0.001  | -0.013 | 0.031  | 32 |
|      |        |       |        |        |        |        |    |

|      |        |        |       |        |        |        |    |
|------|--------|--------|-------|--------|--------|--------|----|
| 2923 | -0.006 | 0.003  | 0.114 | 0.001  | -0.013 | 0.025  | 36 |
| 228  | -0.025 | -0.006 | -0.03 | 0.028  | -0.112 | -0.265 | 95 |
| 2400 | 0.015  | 0.03   | 0.114 | -0.038 | -0.058 | -0.011 | 15 |
| 625  | 0.012  | 0.023  | 0.026 | 0.002  | -0.071 | -0.128 | 80 |
| 1629 | -0.016 | 0.059  | 0.151 | -0.023 | -0.036 | 0.015  | 17 |
|      |        |        |       |        |        |        |    |



|      |        |        |       |        |        |        |    |
|------|--------|--------|-------|--------|--------|--------|----|
| 716  | 0.001  | -0.005 | 0.028 | -0.022 | -0.055 | -0.127 | 83 |
| 1416 | 0.003  | 0.008  | 0.138 | 0.01   | -0.084 | -0.045 | 46 |
| 3758 | -0.002 | 0.012  | 0.022 | 0.01   | -0.063 | -0.095 | 61 |
| 622  | -0.025 | 0.032  | 0.025 | 0.01   | -0.084 | -0.162 | 80 |
| 3183 | 0.003  | -0.075 | 0.113 | -0.002 | 0.044  | -0.037 | 81 |

|      |        |        |       |        |        |        |    |
|------|--------|--------|-------|--------|--------|--------|----|
| 3245 | 0.008  | -0.004 | 0.078 | -0.004 | 0.021  | 0.025  | 55 |
| 880  | -0.006 | -0.014 | 0.046 | -0.003 | 0.018  | -0.033 | 70 |
| 1152 | -0.002 | 0.034  | 0.075 | -0.004 | -0.066 | -0.037 | 48 |
| 3378 | 0.004  | -0.026 | 0.064 | 0.008  | 0.027  | 0.003  | 70 |
| 3501 | 0.012  | -0.021 | 0.068 | 0.039  | -0.115 | -0.137 | 87 |

|      |        |        |       |       |        |        |    |
|------|--------|--------|-------|-------|--------|--------|----|
| 495  | 0.008  | -0.011 | 0.003 | 0.039 | -0.1   | -0.135 | 87 |
| 3305 | 0.008  | -0.006 | 0.072 | 0.004 | -0.104 | -0.1   | 54 |
| 2020 | -0.007 | -0.024 | 0.151 | 0.007 | -0.069 | -0.062 | 59 |
| 924  | 0.012  | -0.024 | 0.068 | 0.039 | -0.069 | -0.094 | 85 |
| 936  | -0.007 | 0      | 0.07  | 0.039 | -0.069 | -0.087 | 84 |

|      |        |        |        |       |        |        |    |
|------|--------|--------|--------|-------|--------|--------|----|
|      |        |        |        |       |        |        |    |
| 138  | 0.012  | 0.048  | -0.043 | 0.031 | -0.069 | -0.141 | 87 |
| 3506 | -0.007 | 0.056  | 0.067  | 0.031 | -0.069 | -0.042 | 64 |
| 1413 | 0.012  | 0.069  | 0.137  | 0.011 | -0.034 | 0.075  | 7  |
| 2566 | 0.001  | -0.008 | 0.114  | 0.011 | -0.052 | -0.008 | 45 |
|      |        |        |        |       |        |        |    |

|      |        |        |        |       |        |        |    |
|------|--------|--------|--------|-------|--------|--------|----|
| 542  | -0.007 | 0.052  | 0.014  | 0.011 | -0.034 | -0.084 | 70 |
| 1205 | -0.025 | 0.021  | 0.108  | 0.014 | -0.023 | -0.025 | 63 |
| 2937 | -0.035 | -0.042 | 0.148  | 0.014 | -0.023 | -0.058 | 74 |
| 3992 | 0.008  | 0.035  | -0.003 | 0.014 | -0.017 | -0.037 | 67 |
| 4122 | 0.021  | 0.017  | -0.02  | 0.014 | -0.023 | -0.111 | 88 |
|      |        |        |        |       |        |        |    |

|      |        |        |       |        |        |        |    |
|------|--------|--------|-------|--------|--------|--------|----|
| 1460 | 0.004  | 0.015  | 0.109 | 0.008  | -0.079 | -0.017 | 39 |
| 3358 | -0.029 | -0.025 | 0.154 | -0.005 | -0.059 | -0.211 | 95 |
| 3361 | 0.001  | -0.02  | 0.066 | -0.004 | -0.066 | -0.097 | 75 |
| 1069 | 0.003  | 0.057  | 0.089 | 0.001  | 0.001  | 0.031  | 36 |
| 3022 | 0.003  | 0.035  | 0.136 | 0.017  | 0.098  | 0.169  | 18 |

|      |        |       |        |        |        |        |    |
|------|--------|-------|--------|--------|--------|--------|----|
| 3584 | -0.002 | 0.042 | 0.041  | -0.001 | -0.009 | -0.003 | 62 |
| 1275 | 0.003  | 0.07  | 0.118  | -0.014 | 0.02   | 0.077  | 9  |
| 2352 | 0.001  | 0.024 | 0.114  | -0.008 | -0.02  | 0.037  | 28 |
| 4067 | 0.008  | 0.009 | -0.012 | -0.003 | 0.035  | -0.037 | 81 |
| 1330 | -0.002 | 0.017 | 0.095  | -0.011 | -0.002 | 0.023  | 32 |

|      |       |       |       |        |        |       |    |
|------|-------|-------|-------|--------|--------|-------|----|
| 1459 | 0.008 | 0.012 | 0.109 | -0.012 | -0.063 | -0.02 | 30 |
| 2181 | 0.001 | 0.001 | 0.114 | 0.023  | 0      | 0.065 | 35 |
| 964  | 0.024 | 0.057 | 0.128 | 0.039  | 0.02   | 0.021 | 55 |
