# Supplementary material for: circRASSF2 Acts as ceRNA and Promotes Papillary Thyroid Carcinoma Progression through miR-1178/TLR4 Signaling Pathway
Source: PubMed Central journal article supplement — Mol Ther Nucleic Acids. 2020 Jan 15;19:1153–63. doi: 10.1016/j.omtn.2019.11.037 (PMC7016041; doi:10.1016/j.omtn.2019.11.037), 2020-01-15
Supplement: mmc3.pdf [file mmc3.pdf]

# circRASSF2 Acts as ceRNA and Promotes Papillary Thyroid Carcinoma Progression through miR-1178/TLR4 Signaling Pathway

Wenhong Zhou,<sup>1,7</sup> Guojun Wu,<sup>2,3,7</sup> Jiyu Li,<sup>2</sup> Xiaona Lin,<sup>4</sup> Yongjie Sun,<sup>5</sup> Hao Xu,<sup>2</sup> Peng Shi,<sup>2</sup> Ling Gao,<sup>6</sup> and Xingsong Tian<sup>2</sup>

<sup>1</sup>Department of Nursing, Shandong Provincial Hospital Affiliated to Shandong University, Jinan 250021, Shandong, China; <sup>2</sup>Department of Breast and Thyroid Surgery, Shandong Provincial Hospital Affiliated to Shandong University, Jinan 250021, Shandong, China; <sup>3</sup>Shandong Provincial ENT Hospital Affiliated to Shandong University, Jinan 250022, Shandong, China; <sup>4</sup>Department of Breast and Thyroid Surgery, Zibo Central Hospital, Zibo 250036, Shandong, China; <sup>5</sup>Department of Breast and Thyroid Surgery, Shandong Provincial Western Hospital, Jinan 250022, Shandong, China; <sup>6</sup>Scientific Center, Shandong Provincial Hospital Affiliated to Shandong University, Jinan 250021, Shandong, China

Circular RNAs (circRNAs) are a class of non-coding RNAs broadly expressed in cells of various species. However, the molecular mechanisms that link circRNAs with progression of papillary thyroid carcinoma (PTC) are not well understood. In the present study, we attempted to provide novel basis for targeted therapy for PTC from the aspect of circRNA-miRNA-mRNA interaction. We investigated the expression of circRNAs in five paired PTC tissues and normal tissues by microarray analysis. The circRNA microarray assay followed by qRT-PCR was used to verify the differential expression of hsa\_circ\_0059354, which is located on chromosome 20 and derived from RASSF2, and thus we named it circRASSF2. The qRT-PCR analysis was to investigate the expression pattern of circRASSF2 in PTC tissues and cell lines. Then the effects of circRASSF2 on cell proliferation and apoptosis were assessed in PTC *in vitro*. Furthermore, bioinformatics online programs predicted and luciferase reporter assays were used to validate the association of circRASSF2 and miR-1178 in PTC cells. In this study, circRASSF2 was observed to be upregulated in PTC tissues and cell lines. Knockdown of circRASSF2 inhibited cell proliferation and promoted cell apoptosis in PTC cells. Bioinformatics analysis predicted that there is a circRASSF2/miR-1178/TLR4 axis in PTC. A dual-luciferase reporter system validated the direct interaction of circRASSF2, miR-1178, and TLR4. Furthermore, circRASSF2 facilitates PTC progression *in vivo*. Importantly, we demonstrated that circRASSF2 was upregulated in serum exosomes from PTC patients. In summary, our study demonstrates that circRASSF2 modulates PTC progression through the miR-1178/TLR4 pathway. Our findings indicate that circRASSF2 may serve as a promising therapeutic target for the treatment of PTC patients.

## INTRODUCTION

Thyroid cancer (TC) is the most prevalent endocrine malignancy, accounting for nearly one-third of head and neck malignancy globally.<sup>1</sup>

Papillary thyroid carcinoma (PTC) accounts for 80%–85% of all cases of TC.<sup>2</sup> Despite improvement in detection and surgical management, including surgical resection, radiotherapy, and levothyroxine treatment, more optimal therapies have remained to be further developed.<sup>3</sup> Hence, it is significant to unveil the underlying mechanism of PTC progression and pathogenesis, which may well provide us with more strategies for PTC treatment.

Circular RNAs (circRNAs) were recently identified as members of the non-coding RNA (ncRNA) family that play a significant role in many cancers' progression.<sup>4–6</sup> Emerging evidence shows that dysregulation of circRNAs plays important roles in biological and pathological processes, including cancer development and progression.<sup>7</sup> circRNAs can serve as competitive endogenous RNAs (ceRNAs) and compete for shared microRNAs (miRNAs).<sup>8</sup> Previous research profiled the circRNA expression of PTC and found 16 significantly differentiated circRNAs in PTC as compared to benign thyroid tissue, suggesting that circRNA dysregulation may play a role in the pathogenesis of PTC.<sup>9</sup>

Exosomes are generated inside multivesicular endosomes and can be secreted from multiple types of cells and participate in intercellular communication by transmitting intracellular cargoes, such as proteins and nucleic acids.<sup>10</sup> It has been reported that numerous circRNAs could be transferred between cancer cells via exosomes.<sup>11</sup> However, the roles and functions of exosomes, specifically exosomal circRNAs derived from PTC cells, are still unknown.

Received 21 August 2019; accepted 12 November 2019;  
<https://doi.org/10.1016/j.omtn.2019.11.037>.

<sup>7</sup>These authors contributed equally to this work.

**Correspondence:** Xingsong Tian, Department of Breast and Thyroid Surgery, Shandong Provincial Hospital Affiliated to Shandong University, Jinan 250021, Shandong, China.  
**E-mail:** [xingsong\\_tian@sina.com](mailto:xingsong_tian@sina.com)

**Correspondence:** Ling Gao, Scientific Center, Shandong Provincial Hospital Affiliated to Shandong University, Jinan 250021, Shandong, China.

**E-mail:** [gaoling8822@sina.com](mailto:gaoling8822@sina.com)

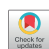

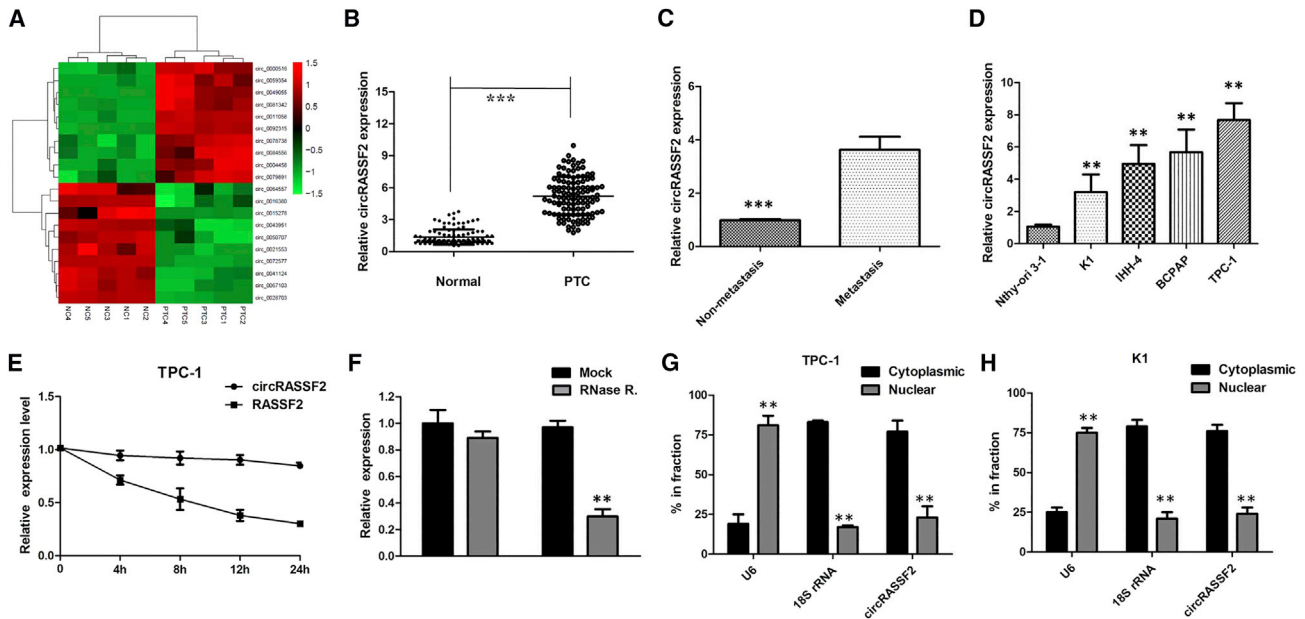

**Figure 1. Deregulated circRNAs in PTC Tumor Tissues**

(A) The heatmap showed the top 10 most increased and decreased circRNAs in PTC tissues as compared to that in the matched non-tumor tissues analyzed by circRNA ArrayStar chip. (B) The level of circRASSF2 was significantly increased in tumor tissues as compared to that in matched non-tumor tissues of 112 pairs of PTC patients.  $***p < 0.001$ . (C) The level of circRASSF2 in PTC patients with metastasis was significantly higher than that in patients without metastasis.  $***p < 0.001$ . (D) The levels of circRASSF2 in PTC cells, compared to that in a human normal thyroid epithelium cell Nthy-ori 3-1. (E) qRT-PCR for the abundance of circRASSF2 and RASSF2 in PTC cells treated with actinomycin D at the indicated time point. (F) circRASSF2 was resistant to RNase R digestion in PTC cells.  $**p < 0.01$ . (G) Levels of circRASSF2 in the nuclear and cytoplasmic fractions of PTC cells.  $**p < 0.01$ . (H) Levels of circRASSF2 in the nuclear and cytoplasmic fractions of K1 cells.  $**p < 0.01$ . Data are the means  $\pm$  SD of three experiments.

Here, using circRNA microarray profiling, we report that the expression of circRASSF2 is markedly elevated both in PTC tissues and exosomes from PTC plasma. Silencing circRASSF2 suppressed PTC cell growth both *in vitro* and *in vivo*. We further demonstrated that the circRASSF2/miR-1178/TLR4 axis plays an important role in regulating PTC cell proliferation. Our findings will provide new insights into the regulatory mechanisms of circRASSF2 in PTC progression.

## RESULTS

### Expression Profiles of circRNAs in Human PTC Tissues

To identify PTC-related circRNAs, we analyzed the expression profile consisting of five pairs of tumor and matched paratumor tissues by using a circRNA microarray. As a result, we identified 478 circRNAs that were significantly upregulated in PTC tumors as compared to normal tissue, whereas 446 circRNAs were downregulated according to our pre-defined fold-change  $>2.0$  and  $p$  value  $<0.05$  thresholds. The heatmap showed the top 10 upregulated and downregulated circRNAs between PTC tissues and non-cancerous matched tissues (Figure 1A), which were then subjected to validation by qRT-PCR. The 10 significantly upregulated circRNAs were selected for qRT-PCR validation. There was an increasing trend in hsa\_circ\_0059354 (chr20, 4760668-4766974) levels from matched paratumor tissues to PTC tumor tissues, with a more than 10-fold change from microarray analysis. By browsing the human reference genome (GRCh37/

hg19), we identified that circ\_0059354 is derived from RASSF2, which is located on chromosome 20, and thus we named it circRASSF2.

### circRASSF2 Was Upregulated in PTC Tissues and Cell Lines

Moreover, the expression level of circRASSF2 was examined in PTC samples and adjacent samples collected from 112 PTC patients. As expected, circRASSF2 was expressed at a higher level in PTC samples compared to adjacent normal samples ( $p < 0.001$ ; Figure 1B). Furthermore, the relative higher level of circRASSF2 was determined in patients with distant metastasis compared to those without metastasis stage ( $p < 0.01$ ; Figure 1C). Then, the correlations of circRASSF2 expression and special clinicopathological parameters and prognosis of PTC were analyzed. Correlation regression analysis of 112 samples demonstrated that high expression of circRASSF2 was significantly correlated with tumor stage ( $p = 0.005$ ) and lymph node metastasis ( $p = 0.003$ ) (Table 1). Consistently, the expression level of circRASSF2 was found to be higher in PTC cell lines compared to human normal thyroid epithelium cell Nthy-ori 3-1 ( $p < 0.01$ ; Figure 1D). These data indicated that circRASSF2 might be a participant in tumorigenesis of PTC.

### circRASSF2 Promotes Cell Proliferation and Migration of PTC Cells *In Vitro*

To explore the role of circRASSF2 in PTC cellular function, we designed functional assays in two different PTC cell lines. According to the data in Figure 1D, the K1 cells exhibited the relative lowest expression level of

**Table 1. Clinical Characteristics of 112 PTC Patients According to circRASSF2 Expression Levels**

| Characteristics       | circRASSF2 Expression |               | p     |
|-----------------------|-----------------------|---------------|-------|
|                       | Low (n = 56)          | High (n = 56) |       |
| Age (Years)           |                       |               |       |
| ≥ 45                  | 32                    | 36            | 0.561 |
| Gender                |                       |               |       |
| female                | 40                    | 35            | 0.422 |
| T-Stage               |                       |               |       |
| T2–4                  | 12                    | 20            | 0.143 |
| Lymph Node Metastasis |                       |               |       |
| yes                   | 6                     | 20            | 0.003 |
| TNM Stage Group       |                       |               |       |
| II–IV                 | 6                     | 19            | 0.005 |
| Multifocality         |                       |               |       |
| yes                   | 10                    | 18            | 0.126 |

circRASSF2, while the TPC-1 cells presented the highest level of circRASSF2 expression. Thus, we overexpressed circRASSF2 in K1 cells but silenced it in TPC-1 cells. At first, we designed three small interfering RNAs (siRNAs) targeting the junction sites of circRASSF2 to disrupt circRASSF2 expression in TPC-1 cells; qRT-PCR results showed that the expression of circRASSF2, but not its linear isoform, was specifically silenced by these three siRNAs. The si-circRASSF2#1 had higher efficiency of interference than si-circRASSF2#2 and si-circRASSF2#3 (Figures S1A and S1C;  $p < 0.01$ ); thus, we chose si-circRASSF2#1 subsequently for the following experiments, and the sequence was used to establish lentiviral-mediated stable circRASSF2-silencing cell lines. In addition, the circRASSF2-expressing vector was also constructed to overexpress circRASSF2 in K1 cells, and we verified that it could specifically increase circRASSF2 expression, but not that of the unspliced precursor (Figures S1B and S1D;  $p < 0.01$ ).

Next, we investigated the stability and localization of circRASSF2 in TPC-1 cells. Total RNAs from TPC-1 cells were isolated at the indicated time points after treatment with actinomycin D, an inhibitor of transcription. Then qRT-PCR was performed to measure the level of circRASSF2 and RASSF2 mRNA. The results showed that the half-life of circRASSF2 exceeded 24 h, whereas that of RASSF2 mRNA was about 3 h in TPC-1 cells (Figure 1E). Furthermore, we found that circRASSF2 was resistant to RNase R digestion (Figure 1F;  $p < 0.01$ ). We then investigated the localization of circRASSF2. The qRT-PCR of RNAs from nuclear and cytoplasmic fractions indicated that circRASSF2 was predominantly localized in the cytoplasm of TPC-1 and K1 cells (Figures 1G and 1H;  $p < 0.01$ ). Collectively, the above data suggested that circRASSF2 harbored a loop structure and was predominantly localized in the cytoplasm.

Then we performed a cell counting kit-8 (CCK-8) assay to detect cell viability of cells with high or low levels of circRASSF2. The results

indicated that overexpression of circRASSF2 efficiently enhanced cell viability of K1, whereas downregulation of circRASSF2 led to the decreased cell viability of TPC-1 (Figures 2A and 2B;  $p < 0.01$ ). Through colony formation, we determined that overexpression of circRASSF2 markedly promoted cell proliferation, while knockdown of circRASSF2 led to an opposite result (Figures 2C and 2D;  $p < 0.01$ ). Ectopic expression of circRASSF2 promoted, but silencing of circRASSF2 inhibited, the migratory and invasive capabilities of PTC cells, as demonstrated by Transwell migration and invasion assays (Figures 2E and 2F;  $p < 0.01$ ).

#### Downregulation of circRASSF2 Promotes G1 Arrest and Causes Apoptosis in PTC Cells *In Vitro*

To assess whether the pro-proliferative effects of circRASSF2 on the PTC cells are mediated by promoting cell cycle progression, we examined cell cycling in PTC cells by flow cytometry. We proved that knockdown of circRASSF2 caused significant G1 phase cell cycle arrest of TPC-1 cells ( $p < 0.01$ ; Figure 3A). Enhanced circRASSF2 expression increased the G2 phase percentage and decreased G1 phase percentage of K1 cells ( $p < 0.01$ ; Figure 3B). Moreover, flow cytometric analysis was utilized to investigate whether apoptosis regulation is a potential contributing factor to cell growth progress induced by knockdown of circRASSF2. The results demonstrated that the apoptotic percentage of circRASSF2-silenced TPC-1 cells were obviously increased ( $p < 0.01$ ; Figure 3C). As expected, cell apoptosis was markedly decreased in K1 cells by overexpression of circRASSF2 ( $p < 0.01$ ; Figure 3D).

#### Knockdown of circRASSF2 Inhibits PTC Growth *In Vivo*

Animal study was carried out to demonstrate the role of circRASSF2 in regulating PTC growth. TPC-1 cells stably transfected with sh-circRASSF2#1 or sh-negative control (NC) were separately injected into nude mice. 28 days later, the tumors were removed and calculated. Our result showed that tumor volume derived from cells transfected with sh-circRASSF2#1 was smaller than those in the sh-NC group (Figure 4A). Tendencies in tumor volume and tumor weight were consistent with those in tumor size (Figure 4B). Finally, immunohistochemical staining indicated that ki-67 positivity in the sh-circRASSF2#1 group was significantly lower in sh-NC group (Figure 4C).

Further, we established a nude mouse xenograft model by implanting K1 cells with vector or circRASSF2. We found that overexpression of circRASSF2 drastically increased tumor growth of K1 cells. The tumor volumes and weights were significantly accelerated by circRASSF2 (Figures 4D and 4E). Results of immunohistochemistry (IHC) revealed that xenograft tumors derived from K1 cells with overexpression of circRASSF2 had lower expression of TUNEL than the vector group (Figure 4F). Taken together, these findings suggest that circRASSF2 may play an oncogenic role in PTC *in vivo*.

#### circRASSF2 Serves as a Sponge for miR-1178 in PTC

To investigate the regulatory pattern of circRASSF2 in PTC, we mainly focused on “miRNA sponges” because circRASSF2 is stable and located in the cytoplasm. The StarBase v2.0 target prediction

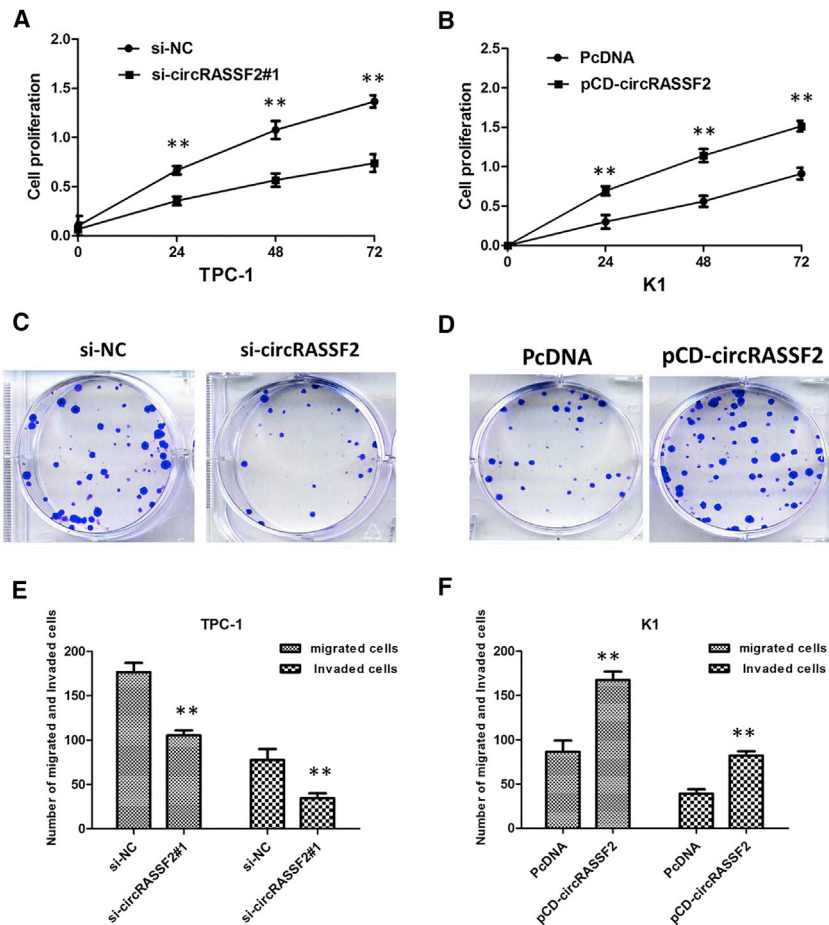

**Figure 2. circRASSF2 Promotes Cell Proliferation and Migration of PTC Cells *In Vitro***

(A) CCK-8 assay showed that circRASSF2 knockdown significantly repressed cell proliferation of TPC-1 cells. (B) CCK-8 assay showing overexpression of circRASSF2 promoted the proliferation of K1 cells. (C) Colony-formation assay showed that circRASSF2 knockdown significantly reduced cancer cell colony-forming ability of TPC-1 cells. (D) Colony formation assay showed that overexpression of circRASSF2 significantly promoted cancer cell colony-forming ability of K1 cells. (E) Transwell assay showed that circRASSF2 knockdown inhibited the migratory and invasive capabilities of TPC-1 cells. (F) Transwell assay showed that overexpression of circRASSF2 significantly promoted the migratory and invasive capabilities of K1 cells. All tests were performed at least three times. Data were expressed as mean  $\pm$  SD. \*\*\* $p < 0.001$ ; \*\* $p < 0.01$ .

tool was used to investigate the potential miRNAs associated with circRASSF2, and the most potentially complementary binding miRNAs were presented. Based on ceRNA analysis, circRASSF2 was able to directly bind to 190 miRNAs (Table S1); however, miR-1178 was finally selected because they ranked highly in correspondence with the positions of the putative binding sites in the 3' UTR of circRASSF2 (Figure 5A). A dual-luciferase reporter assay was practiced for the exploration of whether miR-1178 functioned a target of circRASSF2. We discovered that luciferase activity was remarkably decreased with the cell transfection of miR-1178 mimics and circRASSF2-wild-type (WT) rather than co-transfection of NC and circRASSF2-WT; meanwhile, cell transfection of miR-1178 mimics and circRASSF2-mutant (Mut) had no effects on luciferase activity (Figure 5B;  $p < 0.01$ ). A previous study reported that Argonaute 2 (Ago2) protein binds with both circRNAs and miRNAs to form the RNA-induced silencing complex. Therefore, an RNA immunoprecipitation (RIP) assay was presently performed to pull down RNA transcripts bound to Ago2 in Huh7 cells. As expected, both circRASSF2 and miR-1178 were efficiently pulled down by anti-Ago2, but not by the non-specific anti-immunoglobulin G (IgG) antibody (Figure 5C). These findings indicated that circRASSF2 acts as a sponge for miR-1178.

We examined the expression of miR-1178 by qRT-PCR in PTC and matched non-tumor tissue samples from 112 patients. The results of qRT-PCR showed lower expression of miR-1178 in PTC tissues than in matched non-tumor tissues (Figure 5D;  $p < 0.01$ ). Next, we measured the levels of miR-1178 expression in various PTC cell lines (Figure 5E;  $p < 0.01$ ). TPC-1 cells showed the lowest expression of miR-1178, and K1 cells showed higher expression of miR-1178, indicating the opposite result to circRASSF2 expression. Subsequently, we examined the expression level of miR-1178 in cells with high or low circRASSF2 level. The results showed that miR-1178 was efficiently downregulated by overexpressed circRASSF2 but was upregulated by silenced circRASSF2 (Figures S1E and S1F;  $p < 0.01$ ).

To change the expression level of miR-1178 in PTC cells, miR-1178 inhibitor and miR-1178 mimics were separately transfected into K1 and TPC-1 cells. Functionally, we found that inhibition of miR-1178 had positive effect on cell proliferation but had a negative effect on cell apoptosis (Figures S2A and S2C;  $p < 0.01$ ). On the other hand, upregulation of miR-1178 led to growth inhibition by suppressing cell proliferation and promoting cell apoptosis (Figures S2B and S2D;  $p < 0.01$ ). Collectively, these data indicate that miR-1178 can inhibit PTC cell proliferation, which inversely correlates with the effects of circRASSF2 in PTC cells.

#### TLR4 Was a Direct Target of miR-1178

Previous studies have reported that several genes, including STK4, TLR4, G3BP2, and CHIP, are directly targeted by miR-1178 in human cancers. However, we did not detect significant changes in the expression levels of these mRNAs in TPC-1 cells transfected with a miR-1178 mimic or in K1 cells transfected with a miR-1178 inhibitor, except for the expression of the TLR4 (Figures S2E and S2F;  $p < 0.01$ ). TargetScan online software demonstrated that TLR4 was a candidate target of

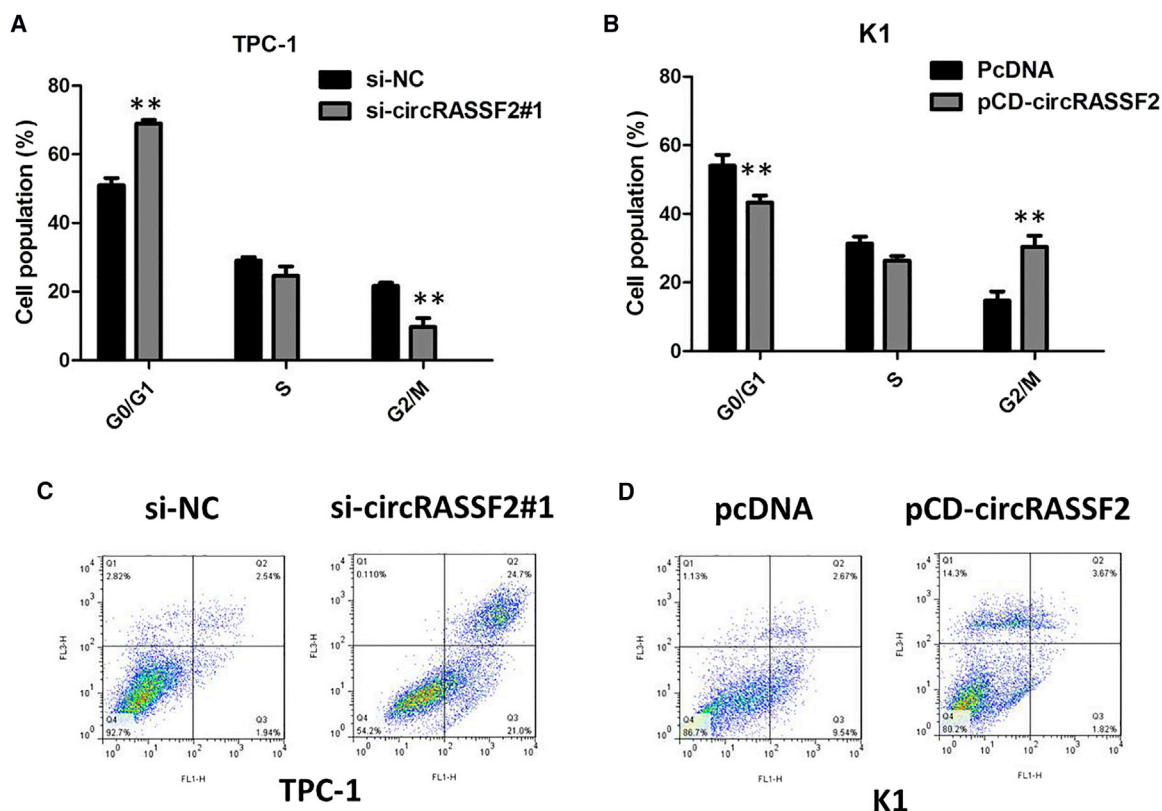

**Figure 3. Downregulation of circRASSF2 Promotes G1 Arrest and Causes Apoptosis in PTC Cells *In Vitro***

(A) Flow cytometric analysis showed that knockdown of circRASSF2 caused significant G1 phase cell cycle arrest of TPC-1 cells. (B) Flow cytometric analysis showed that circRASSF2 overexpression increased the G2/M phase percentage and decreased G0/G1 phase percentage of K1 cells. (C) Flow cytometric analysis showed that circRASSF2 knockdown significantly induced apoptosis of TPC-1 cells. (D) Flow cytometric analysis showed that circRASSF2 overexpression decreased the apoptosis of K1 cells.

miR-1178 (Figure 6A). To further validate the inference, a wild-type or mutant TLR4 3' UTR luciferase reporter vector was constructed. TLR4-WT or TLR4-Mut was co-transfected with miR-1178 mimics or negative control into 293T cells. The relative luciferase activity was remarkably reduced in cells co-transfected with the TLR4-WT luciferase reporter and miR-1178 mimic than in the negative control cells. However, inhibitory effects were abolished when 3' UTRs that contained both mutant-binding sites were co-transfected with miR-1178, confirming that TLR4 is a target of miR-1178 ( $p < 0.01$ ; Figure 6B). We determined the expression of TLR4 in 112 TPC patient tissues using an IHC assay. The results of IHC showed that TLR4 expression in TPC specimens was significantly upregulated compared with that in the adjacent normal tissues. TLR4 overexpression was observed in 89 of 112 (79.46%) TPC specimens when compared with adjacent non-neoplastic tissues (26 of 112, 23.21%), the difference of TLR4 expression was statistically significant ( $p < 0.0001$ ; Figure 6C). Additionally, mRNA levels of TLR4 were decreased in TPC-1 cells transfected with miR-1178 mimics and were increased in K1 cells transfected with miR-1178 inhibitors (Figures S2E and S2F;  $p < 0.01$ ). Then, we observed that TLR4 expression was decreased in TPC-1 cells by circRASSF2 suppression, and the effect of inhibition of circRASSF2 was

attenuated by miR-1178 inhibitor ( $p < 0.01$ ; Figures 6D and 6E). These data further demonstrated the regulatory network of circRASSF2/miR-1178/TLR4. According to the above data, we confirmed that circRASSF2 can exert function in PTC by sponging miR-1178 to upregulate TLR4 expression.

#### circRASSF2 Is Secreted by Exosomes into Serum of PTC Patients

Finally, in our current study, we collected abundant of serums from 30 PTC patients and 30 healthy people. After isolation of serum exosomes by sequential centrifugation, transmission electron microscopy (TEM) analysis showed that isolated PTC-secreted exosomes had similar morphologies (30–150 nm in diameter) and exhibited a round-shaped appearance (Figure 7A). The nanoparticle tracking analysis (NTA) results demonstrated that isolated PTC-secreted exosomes showed a similar size distribution, and the peak size range was 80–135 nm. Moreover, the presence of the exosome markers CD63, TSG101, and HSP70 were confirmed by western blot (Figure 7B). Our results showed that circRASSF2 expression is detectable in extracted serum exosomes derived from PTC patients (Figure 7C;  $p < 0.01$ ). Furthermore, there was a significant inverse correlation between the expression levels of

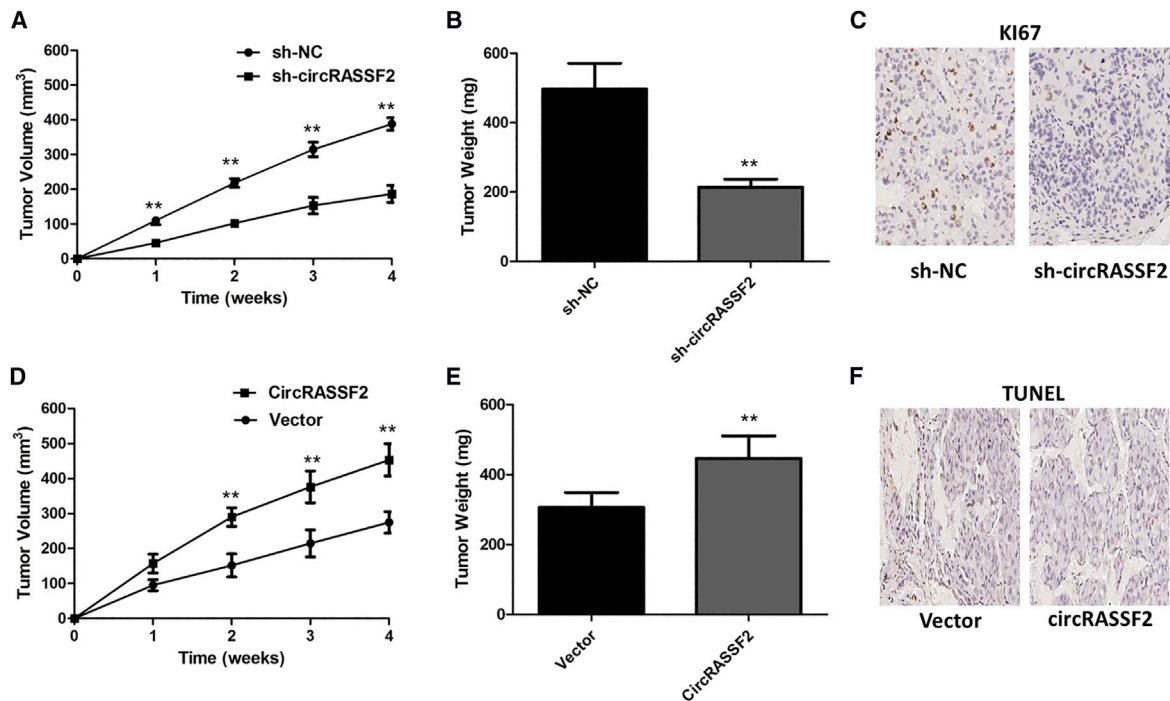

**Figure 4. circRASSF2 Promoted PTC Cell Growth *In Vivo***

(A) The volume of subcutaneous xenograft tumors of TPC-1 cells isolated from nude mice.  $**p < 0.01$ . (B) The weight of subcutaneous xenograft tumors of TPC-1 cells isolated from nude mice.  $**p < 0.01$ . (C) IHC analysis was performed to examine the expression levels of ki-67 in xenograft tumors of TPC-1 cells isolated from nude mice. (D) The volume of subcutaneous xenograft tumors of K1 cells isolated from nude mice.  $**p < 0.01$ . (E) The weight of subcutaneous xenograft tumors of K1 cells isolated from nude mice.  $**p < 0.01$ . (F) IHC analysis was performed to examine the expression levels of TUNEL in xenograft tumors of K1 cells isolated from nude mice.

circRASSF2 and miR-1178 in serum exosomes derived from PTC patients (Figure 7D).

## DISCUSSION

Recently, a great deal of research has revealed the crucial role of circRNAs in tumorigenesis.<sup>12,13</sup> In this present study, we analyzed the expression profiles of circRNAs from PTC and matched non-tumor normal tissues by microarray and focused on the role and underlying mechanism of the increased circRASSF2 expression. We thoroughly investigated the expression, biological roles, and mechanisms of action of circRASSF2 in PTC. We found that circRASSF2 was significantly elevated in PTC tissues and cell lines compared with normal tissues and the Nthy-ori 3-1 cell line. Elevated expression of circRASSF2 was positively correlated with tumor size, tumor stage, and poor lymph node metastasis. Gain-of-function experiments revealed that ectopic expression of circRASSF2 promoted proliferation and inhibited apoptosis of PTC cells. Loss-of-function experiments revealed that knockdown of circRASSF2 inhibited proliferation and promoted apoptosis of PTC cells. In addition, xenograft experiments showed that circRASSF2 promoted PTC xenograft growth *in vivo*. Specifically, we also showed mechanistically that circRASSF2 promotes the progression of PTC by acting as the sponge of miR-1178. Finally, we showed that overexpressed circRASSF2 was secreted by exosomes into the serum of PTC patients, suggesting that circRASSF2 might be a novel clinical molecular marker for PTC patients.

Functionally, upregulated circRNAs can promote cell proliferation and inhibit apoptosis, thereby facilitating tumorigenesis.<sup>14–16</sup> In our current study, we investigated whether circRASSF2 was a regulator in tumorigenesis of PTC. Both gain- or loss-of-function assays were carried out in two PTC cell lines. As expected, high expression of circRASSF2 promoted cell proliferation and suppressed cell apoptosis, indicating the oncogenic property of circRASSF2 in PTC cells. *In vivo* animal study further demonstrated that circRASSF2 could promote PTC growth. These data indicated that circRASSF2 exerted oncogenic function in the tumorigenesis of PTC.

In recent years, emerging evidence proposed that circRNAs mainly act as a miRNA sponge to exert their post-transcriptional functions as ceRNAs, which is more effective than the traditional anti-miRNA approach.<sup>17,18</sup> Herein, using various assays, we found that circRASSF2 promoted PTC progression, mainly through interaction with miR-1178. We found that miR-1178 was expressed at a significantly lower level in PTC tumor tissues than in paratumor tissues. Next, we verified that circRASSF2 had an endogenous sponge-like effect on miR-1178 in PTC. First, we found that circRASSF2 levels are negatively correlated with miR-1178 levels in PTC patients' tissues. Furthermore, bioinformatics prediction and a luciferase reporter assay showed that circRASSF2 and the TLR4 3' UTR share identical miR-1178 response elements and might therefore bind competitively to miR-1178. Third, circRASSF2 could bind directly to miR-1178 in

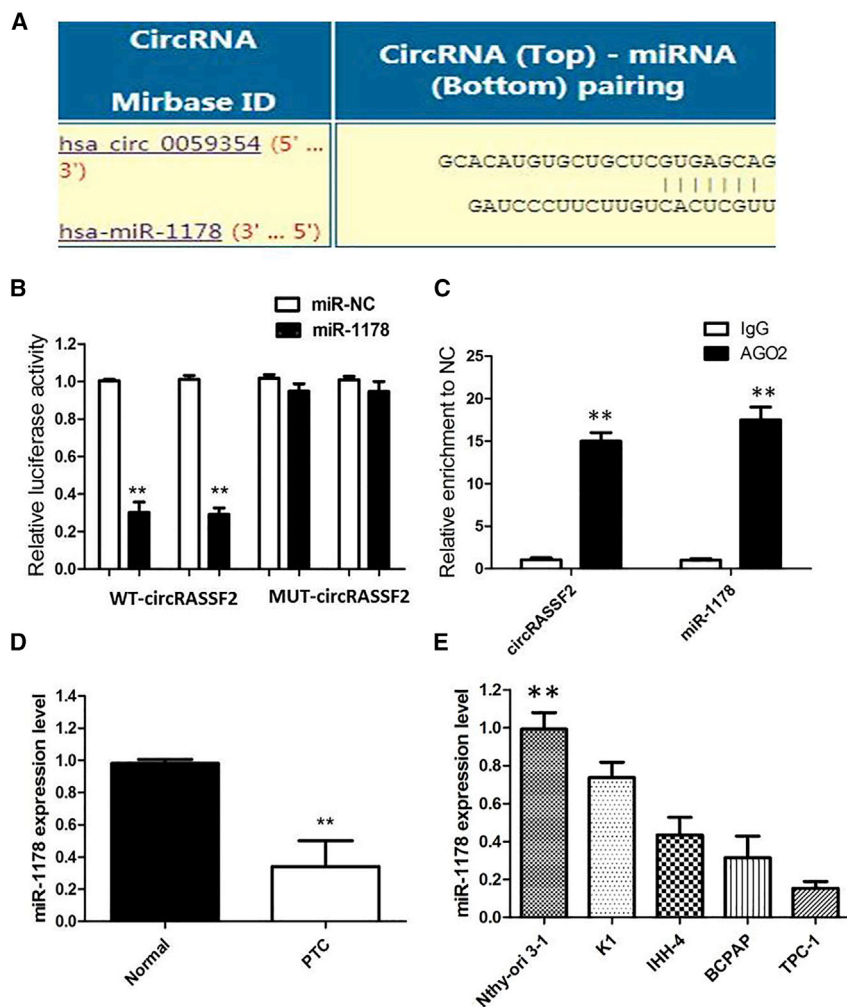

**Figure 5. circRASSF2 Serves as a Sponge for miR-1178 in PTC**

(A) miRNA response elements (MREs) are shown by which circRASSF2 sequesters miR-1178. Mutations were generated in MREs. (B) Dual-luciferase reporter showed significant reduction of luciferase activity of the wild-type, and luciferase activity is restored by the mutant sequence. (C) The Ago2 RIP showed that Ago2 significantly enriched circRASSF2 and miR-1178. (D) The level of miR-1178 was significantly decreased in tumor tissues as compared to that in matched non-tumor tissues of PTC patients. (E) The levels of miR-1178 in various PTC cell lines. Data are the means  $\pm$  SD of three experiments. \*\* $p < 0.01$ .

miR-1178 and released TLR4 to promote the development of PTC, which might well aid intervention strategies of PTC in the future. All our findings may contribute to investigate molecular mechanism associated with PTC tumorigenesis and will provide new thought in exploring the novel diagnostic or therapeutic biomarker for PTC.

## MATERIALS AND METHODS

### Clinical Samples

The paired samples used in this study ( $n = 112$ ) consisted of tumor tissue and adjacent unaffected thyroid tissue from PTC patients collected at the Department of Breast and Thyroid Surgery, Shandong Provincial Hospital Affiliated to Shandong University from January 2010 to January 2018. All cases were confirmed via pathological diagnosis. These patients did not receive chemotherapy, radiotherapy, or other treatments of TC before operation. All the patients were

an AGO2-dependent manner. Finally, circRASSF2 could control the TLR4 level by provoking miR-1178. It has recently been reported that circRNAs can act as miRNA sponges to negatively control miRNA. Taken together, the study revealed that a circRASSF2/miR-1178/TLR4 axis exists in PTC.

Exosomes have been reported to be involved in each process of cancer, such as angiogenesis, metastasis, epithelial-mesenchymal transition (EMT), and immune escape.<sup>19,20</sup> Although several studies have shown that exosomal circRNAs are potential markers for cancer,<sup>21</sup> none are aimed at clarifying the expression of cancer-secreted circRNAs in PTC. Here, we performed TEM to reveal the shapes and size of exosomes from plasma of PTC patients. Notably, we found that the highly expressed circRASSF2 could be examined to serum exosomes of PTC patients.

Above all, our present study demonstrated that circRASSF2 was up-regulated in PTC tissues and cell lines and was an oncogenic factor that promoted tumorigenesis. circRASSF2 acted as a ceRNA of

pathologically confirmed, and the tissues were collected immediately after they were obtained during the surgical operation and then stored at  $-80^{\circ}\text{C}$  to prevent RNA loss. Besides, 112 paraffin samples of these PTC patients were recruited in this study, and their paired cancerous and non-cancerous tissue blocks were collected. For exosome purification, serum samples were collected from PTC patients and healthy donors. All patients provided written informed consent in accordance with the Declaration of Helsinki. The procedures in the study were scrutinized and approved by Medical Ethics Committee of Shandong Provincial Hospital Affiliated to Shandong University.

### Cell Culture and Transfection

Human PTC cell lines K1, IHH-4, BCPAP, and TCP1 and human thyroid follicular epithelial cells Nthy-ori 3-1 were obtained from Shanghai Institute of Cell Biology (Shanghai, China) and were cultured in RPMI-1640 medium (HyClone, Logan, UT, USA) with 10% fetal bovine serum (FBS) and 1% antibiotics (both from Gibco-BRL, Gaithersburg, MD, USA). Oligonucleotide

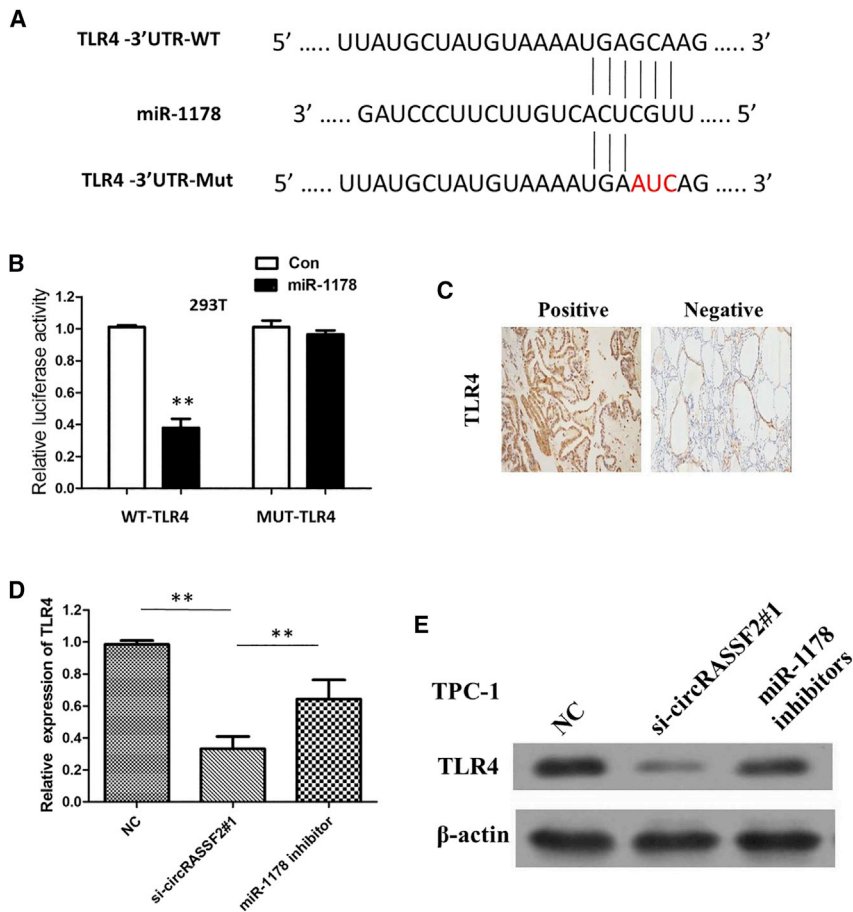

**Figure 6. TLR4 Was a Direct Target of miR-1178**

(A) Bioinformatics analysis revealed the predicted binding sites between TLR4 and miR-1178. (B) Luciferase reporter assay demonstrated that miR-1178 mimics significantly decreased the luciferase activity of TLR4-WT in 293T cells. (C) IHC analysis was performed to examine the expression levels of TLR4 in PTC tissues and adjacent normal tissues. (D) The effect of knockdown circRASSF2 on mRNA levels of TLR4 was attenuated by miR-1178 inhibitor. (E) The effect of knockdown circRASSF2 on protein levels of TLR4 was attenuated by miR-1178 inhibitor. All tests were performed at least three times. Data were expressed as mean  $\pm$  SD. \*\* $p < 0.01$ ;

protocol. For circRNAs, RNase R was used to degrade linear RNA, which have poly(A), and was amplified by divergent primer. Specific divergent primers spanning the back-splice junction site of circRNAs were designed. To quantify the amount of mRNA and circRNA, cDNA was synthesized using a PrimeScript RT reagent kit (TaKaRa, Dalian, China). The qRT-PCR analysis on circRNA and mRNA was performed using a PrimeScript RT reagent kit (TaKaRa) and SYBR premix Ex TaqII (TaKaRa).  $\beta$ -actin was used as an endogenous control. For miR-1178 analysis, miRNA was treated with DNase I to eliminate genomic DNA, and cDNA was synthesized by Mir-X miR first-strand synthesis kit (TaKaRa). SYBR premix Ex TaqII (TaKaRa) was used for qRT-PCR. The expression was normalized to

RNU6-2. The  $2^{-\Delta\Delta CT}$  method was adopted to calculate relative expression.

#### Actinomycin D and RNase R Treatment

To block transcription, 2 mg/mL actinomycin D or dimethylsulphoxide (Sigma-Aldrich, St. Louis, MO, USA) as a negative control was added into the cell culture medium. For RNase R treatment, total RNA (2  $\mu$ g) was incubated for 30 min at 37°C with or without 3 U/ $\mu$ g of RNase R (Epicenter Technologies, Madison, WI, USA). After treatment with actinomycin D and RNase R, qRT-PCR was performed to determine the expression levels of circRASSF2 and RASSF2 mRNA.

#### Isolating RNAs from Nucleus and Cytoplasmic Fractions

The nuclear and cytoplasmic fractions were isolated using a PARIS kit (Invitrogen, Carlsbad, CA, USA) following the manufacturer's protocol. In brief, cells were collected and lysed with cell fractionation buffer, followed by centrifugation to separate the nuclear and cytoplasmic fractions. The supernatant containing the cytoplasmic fraction was collected and transferred to a fresh RNase-free tube. The nuclear pellet was lysed with cell disruption buffer. The cytoplasmic fraction and nuclear lysate were mixed with 2 $\times$  lysis/binding

transfection siRNA, miRNA mimics, and inhibitors were purified and synthesized by RiboBio (Guangzhou, China) or Gene-Pharma (Shanghai, China). The lentivirus targeting human circRASSF2 was purchased from GeneChem (Shanghai, China). Transfection was performed using Lipofectamine 2000 reagent (Invitrogen). The circRASSF2 sequences were subcloned into pGLV3/H1/GFP/Puro vectors to construct sh-circRASSF2 for animal studies.

#### Analyzing circRNA Expression Profile

Five matched PTC and adjacent non-cancerous tissues were analyzed using the circRNAs chips. The microarray hybridization and collection of data were performed (ArrayStar human circRNAs chip; ArrayStar, Rockville, MD, USA). The five most up- and downregulated circRNAs and their hierarchical clustering analysis were performed based on their expression value using the Cluster and TreeView program.

#### RNA Extraction and qRT-PCR

The total RNA was isolated from tissues and cell lines using TRIzol reagent (Invitrogen, CA, USA), and exosomal RNA was extracted from plasma and culture medium using the exoRNeasy midi kit (QIAGEN, Valencia, CA, USA) according to the manufacturer's



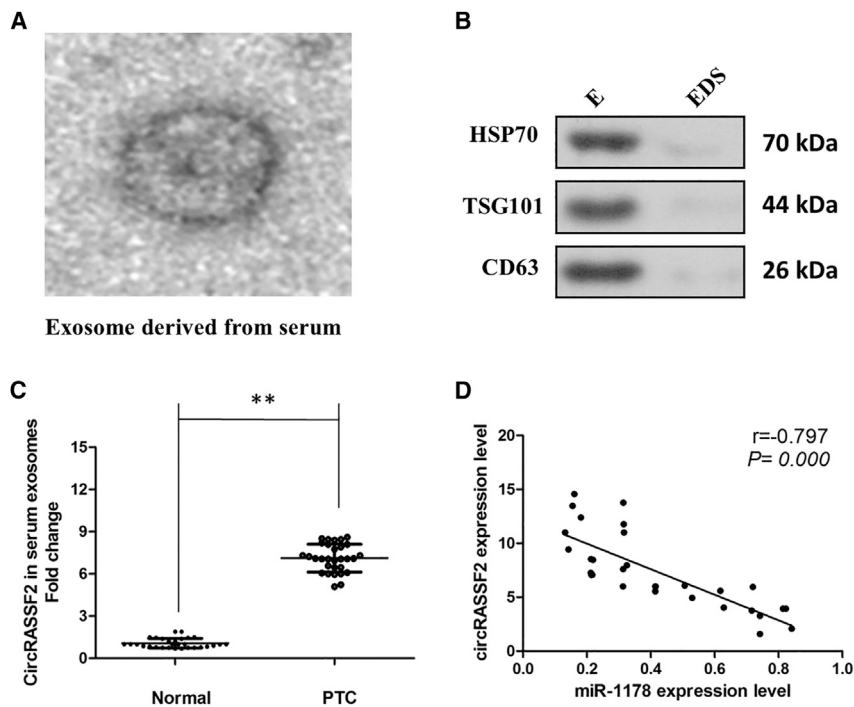

**Figure 7. circRASSF2 Is Secreted by Exosomes into Serum of PTC Patients**

(A) circRASSF2 was secreted into exosomes derived from serum of PTC patients. A representative image of exosome (indicated by red arrows) derived from serum of PTC patients detected from electron microscope. (B) WB showing the expression of TSG101 and HSP70, which are the markers of exosome from purified serum exosome. (C) qRT-PCR for the abundance of circRASSF2 in serum exosomes. The levels of circRASSF2 in serum exosomes from PTC patients were significantly higher than that in normal individuals. (D) The expression levels of circRASSF2 were negatively correlated with that of miR-1178 in the exosomes extracted from serum of PTC patients. All tests were performed at least three times. Data were expressed as mean  $\pm$  SD. \*\* $p < 0.01$ .

#### Matrigel Invasion Assay

Cells were seeded ( $5 \times 10^4$  cells suspended in 0.5 mL of no-FBS media) in duplicate into 12-well Corning BioCoat Matrigel invasion chambers with an 8- $\mu$ m pore-size polyethylene terephthalate membrane. As a chemotaxis factor, FBS (10%) was added to the lower compartment of the Matrigel invasion chambers. After 24 h of

incubation at 37°C in 5% CO<sub>2</sub> cells that had migrated through the pores were stained by JorVet DipQuick stain assay and counted under a microscope (six slides per well; each experiment was repeated six times).

#### Western Blotting

Total protein was extracted with 1 $\times$  NuPAGE LDS sample buffer (Thermo Fisher Scientific) according to manufacturer's instructions. To identify exosome markers, primary antibodies against TLR4, CD63, and TSG101 were purchased from Abcam (Cambridge, UK), and primary antibodies against HSP70 were obtained from Cell Signaling Technology (CST; Beverly, MA, USA). The secondary antibodies were F(ab)<sub>2</sub> fragments of donkey anti-mouse immunoglobulin or donkey anti-rabbit immunoglobulin linked to horseradish peroxidase (Jackson ImmunoResearch, USA). Immunoblotting reagents from an electrochemiluminescence kit were used (Amersham Biosciences, Uppsala, Sweden).

#### Bioinformatic Analysis

Agilent feature extraction software (version 11.0.1.1) was used to analyze acquired array images. Data processing was performed using the R software package. Differentially expressed circRNAs with statistical significance between two groups were identified through volcano plot filtering. Differentially expressed circRNAs between two samples were identified through fold change filtering. The circRNA and miRNA interaction was predicted with ArrayStar's home-made software based on TargetScan and miRanda.

solution and then added with 100% ethanol. The sample mixture was drawn through a filter cartridge followed by washing with wash solution. The RNAs of nuclear and cytoplasmic fractions were eluted with elution solution. U6 snRNA (small nuclear RNA) and 18S rRNA were employed as positive controls for nuclear and cytoplasmic fractions, respectively.

#### CCK-8 Assay

Cells were seeded into 96-well plates and CCK-8 solution (Dojindo Laboratories, Japan, 10  $\mu$ L) was added 48 h after transfection. The absorbance at 450 nm was measured after incubation at 37°C for 2 h with microtiter plate reader (Bio-Tek EPOCH2, USA).

#### Cell Cycle Assay

For cell cycle analysis, transfected cells were fixed in 70% ethanol overnight at  $-20^\circ\text{C}$  and stained with propidium iodide (Kaiji, Nanjing, China). Cell cycle assays were conducted at 48 h after transfection.

#### Cell Apoptosis Analysis

Detecting apoptosis by flow cytometry An annexin V-allophycocyanin (APC)/DAPI double-staining kit (Thermo Fisher Scientific) was used to analyze cellular apoptosis. Cells were seeded in 6-well plates ( $5 \times 10^5$  cells/well) and then digested with trypsin (Gibco trypsin-EDTA, Thermo Fisher Scientific), washed with PBS three times, suspended in 500  $\mu$ L of binding buffer, and then incubated with 5  $\mu$ L of fluorescein isothiocyanate (FITC)-conjugated annexin V and 3  $\mu$ L of PI for 15 min at room temperature in the dark. The stained cells were detected using the BD FACS Aria II flow cytometer (BD Biosciences, Hercules, CA, USA).

### Luciferase Reporter Assay

Cells were seeded into 24-well plates in triplicate. After 24 h, the cells were transfected with pmirGLO-circRASSF2-WT (or pmirGLO-circRASSF2-Mut) or pmirGLO-TLR4-WT (or pmirGLO-TLR4-Mut) and miR-1178 mimic, or miR-NC using Lipofectamine 3000 (Invitrogen). Luciferase activity was measured in cell lysates 24 h after transfection using a dual-luciferase reporter system (Promega, Madison, WI, USA).

### Xenograft Model

For xenograft model of TCP1 cells, 6-week-old male BALB/c nude mice were housed under standard conditions and cared for according to protocols.  $1 \times 10^6$  TCP1 cells with circRASSF2 knockdown and their respective control vectors were suspended in 100  $\mu$ L of PBS and subcutaneously injected into the flanks of nude mice. For the xenograft model of K1 cells,  $2 \times 10^6$  K1 cells with circRASSF2 over-expressed vector or control vector were suspended in 200  $\mu$ L serum-free RPMI-1640 and subcutaneously injected into the right flank of each mouse. Vernier calipers were used to determine the width and length of tumors each week when the implantations were starting to grow bigger, and the volume was calculated according to the following equation: tumor volume = (length  $\times$  width<sup>2</sup>)/2. After 4 weeks, the mice were sacrificed with gas isoflurane at 2% concentration mixed with medical-grade oxygen, and the tumor tissues were excised, weighed, and snap-frozen at  $-80^\circ\text{C}$  for subsequent analysis. All experimental procedures took place at the animal center of Shandong Provincial Hospital Affiliated to Shandong University. All animal experiments were conducted in accordance with the Institutional Guidelines for the Care and Use of Laboratory Animals of Shandong Provincial Hospital Affiliated to Shandong University.

### IHC

IHC analysis was performed under manufacturer's instructions. In brief, the slides were incubated with primary antibodies overnight at  $4^\circ\text{C}$  and then incubated with secondary antibodies at room temperature for 2 h. The expression was evaluated using a composite score obtained by multiplying the values of staining intensities (0, no staining; 1, weak staining; 2, moderate staining; 3, strong staining) and the percentage of positive cells (0, 0%; 1, <10%; 2, 10%–50%; 3, >50%).

### Exosome Isolation

The plasma was collected and centrifuged at  $3,000 \times g$  for 15 min to remove cells and cellular debris. Exosomes were isolated using the Exoquick exosome precipitation solution (System Biosciences).

### TEM

Exosomes were suspended in 100  $\mu$ L of PBS and were fixed with 5% glutaraldehyde at incubation temperature and then maintained at  $4^\circ\text{C}$  until TEM analysis. According to the TEM sample preparation procedure, we placed a drop of exosome sample on a carbon-coated copper grid and immersed it in 2% phosphotungstic acid solution (pH 7.0) for 30 s. The preparations were observed with a transmission electron microscope (Tecnai G2 Spirit Bio TWIN, FEI, USA).

### Statistical Analysis

Data was presented as mean value  $\pm$  SD in this study. GraphPad Prism 6.0 (La Jolla, CA, USA) was recruited to conduct statistical analysis. Multiple comparisons were conducted by the one-way ANOVA test. p value less than 0.05 was thought to be statistically significant.

### Availability of Data and Materials

The datasets supporting the conclusions of this article are included within the article and its [Supplemental Information](#).

### Ethics Approval and Consent to Participate

The study was approved by the medical ethics committee of Shandong Provincial Hospital Affiliated to Shandong University.

### Consent for Publication

We have received consent from individual patients who have participated in this study. The consent forms will be provided upon request.

### SUPPLEMENTAL INFORMATION

Supplemental Information can be found online at <https://doi.org/10.1016/j.omtn.2019.11.037>.

### AUTHOR CONTRIBUTIONS

L.G. and X.T. performed primer design and experiments. W.Z. and G.W. contributed to the flow cytometry assay and animal experiments. J.L. and X.L. collected and classified the human tissue samples. Y.S. and H.X. contributed to RT-PCR and qRT-PCR. P.S. analyzed the data. L.G. and X.T. wrote the paper. All authors read and approved the final manuscript.

### CONFLICTS OF INTEREST

The authors declare they have no competing interests.

### ACKNOWLEDGMENTS

This work was supported by the Natural Science Foundation of Shandong Province (ZR2014HM115), the Scientific Research Project of Shandong University (12721742), and Key Projects of Jinan Science and Technology Bureau (201805011).

### REFERENCES

1. Siegel, R.L., Miller, K.D., and Jemal, A. (2018). Cancer statistics, 2018. *CA Cancer J. Clin.* 68, 7–30.
2. Carling, T., and Udelsman, R. (2014). Thyroid cancer. *Annu. Rev. Med.* 65, 125–137.
3. Chen, W., Zheng, R., Baade, P.D., Zhang, S., Zeng, H., Bray, F., Jemal, A., Yu, X.Q., and He, J. (2016). Cancer statistics in China, 2015. *CA Cancer J. Clin.* 66, 115–132.
4. Ashwal-Fluss, R., Meyer, M., Pamudurti, N.R., Ivanov, A., Bartok, O., Hanan, M., Evtantal, N., Memczak, S., Rajewsky, N., and Kadener, S. (2014). circRNA biogenesis competes with pre-mRNA splicing. *Mol. Cell* 56, 55–66.
5. Starke, S., Jost, I., Rossbach, O., Schneider, T., Schreiner, S., Hung, L.H., and Bindereif, A. (2015). Exon circularization requires canonical splice signals. *Cell Rep.* 10, 103–111.
6. Qu, S., Yang, X., Li, X., Wang, J., Gao, Y., Shang, R., Sun, W., Dou, K., and Li, H. (2015). Circular RNA: A new star of noncoding RNAs. *Cancer Lett.* 365, 141–148.

7. Memczak, S., Jens, M., Elefsinioti, A., Torti, F., Krueger, J., Rybak, A., Maier, L., Mackowiak, S.D., Gregersen, L.H., Munschauer, M., et al. (2013). Circular RNAs are a large class of animal RNAs with regulatory potency. *Nature* *495*, 333–338.
8. Zlotorynski, E. (2015). Non-coding RNA: Circular RNAs promote transcription. *Nat. Rev. Mol. Cell Biol.* *16*, 206.
9. Peng, N., Shi, L., Zhang, Q., Hu, Y., Wang, N., and Ye, H. (2017). Microarray profiling of circular RNAs in human papillary thyroid carcinoma. *PLoS ONE* *12*, e0170287.
10. Keller, S., Sanderson, M.P., Stoek, A., and Altevogt, P. (2006). Exosomes: from biogenesis and secretion to biological function. *Immunol. Lett.* *107*, 102–108.
11. van der Pol, E., Böing, A.N., Harrison, P., Sturk, A., and Nieuwland, R. (2012). Classification, functions, and clinical relevance of extracellular vesicles. *Pharmacol. Rev.* *64*, 676–705.
12. Holdt, L.M., Kohlmaier, A., and Teupser, D. (2018). Molecular roles and function of circular RNAs in eukaryotic cells. *Cell. Mol. Life Sci.* *75*, 1071–1098.
13. Qin, M., Liu, G., Huo, X., Tao, X., Sun, X., Ge, Z., Yang, J., Fan, J., Liu, L., and Qin, W. (2016). Hsa\_circ\_0001649: A circular RNA and potential novel biomarker for hepatocellular carcinoma. *Cancer Biomark.* *16*, 161–169.
14. Shang, X., Li, G., Liu, H., Li, T., Liu, J., Zhao, Q., and Wang, C. (2016). Comprehensive circular RNA profiling reveals that hsa\_circ\_0005075, a new circular RNA biomarker, is involved in hepatocellular carcinoma development. *Medicine (Baltimore)* *95*, e3811.
15. Xue, J., Liu, Y., Luo, F., Lu, X., Xu, H., Liu, X., Lu, L., Yang, Q., Chen, C., Fan, W., and Liu, Q. (2017). Circ100284, via miR-217 regulation of EZH2, is involved in the arsenite-accelerated cell cycle of human keratinocytes in carcinogenesis. *Biochim Biophys Acta Mol Basis Dis* *1863*, 753–763.
16. Zeng, K., Chen, X., Xu, M., Liu, X., Hu, X., Xu, T., Sun, H., Pan, Y., He, B., and Wang, S. (2018). CircHIPK3 promotes colorectal cancer growth and metastasis by sponging miR-7. *Cell Death Dis.* *9*, 417.
17. Hansen, T.B., Jensen, T.I., Clausen, B.H., Bramsen, J.B., Finsen, B., Damgaard, C.K., and Kjems, J. (2013). Natural RNA circles function as efficient microRNA sponges. *Nature* *495*, 384–388.
18. Zhang, J., Liu, H., Hou, L., Wang, G., Zhang, R., Huang, Y., Chen, X., and Zhu, J. (2017). Circular RNA\_LARP4 inhibits cell proliferation and invasion of gastric cancer by sponging miR-424-5p and regulating LATS1 expression. *Mol. Cancer* *16*, 151.
19. Valadi, H., Ekström, K., Bossios, A., Sjöstrand, M., Lee, J.J., and Lötval, J.O. (2007). Exosome-mediated transfer of mRNAs and microRNAs is a novel mechanism of genetic exchange between cells. *Nat. Cell Biol.* *9*, 654–659.
20. Thakur, B.K., Zhang, H., Becker, A., Matei, I., Huang, Y., Costa-Silva, B., Zheng, Y., Hoshino, A., Brazier, H., Xiang, J., et al. (2014). Double-stranded DNA in exosomes: a novel biomarker in cancer detection. *Cell Res.* *24*, 766–769.
21. Dai, X., Chen, C., Yang, Q., Xue, J., Chen, X., Sun, B., Luo, F., Liu, X., Xiao, T., Xu, H., et al. (2018). Exosomal circRNA\_100284 from arsenite-transformed cells, via microRNA-217 regulation of EZH2, is involved in the malignant transformation of human hepatic cells by accelerating the cell cycle and promoting cell proliferation. *Cell Death Dis.* *9*, 454.

**OMTN, Volume 19**

**Supplemental Information**

**circRASSF2 Acts as ceRNA and Promotes**

**Papillary Thyroid Carcinoma Progression**

**through miR-1178/TLR4 Signaling Pathway**

**Wenhong Zhou, Guojun Wu, Jiyu Li, Xiaona Lin, Yongjie Sun, Hao Xu, Peng Shi, Ling Gao, and Xingsong Tian**

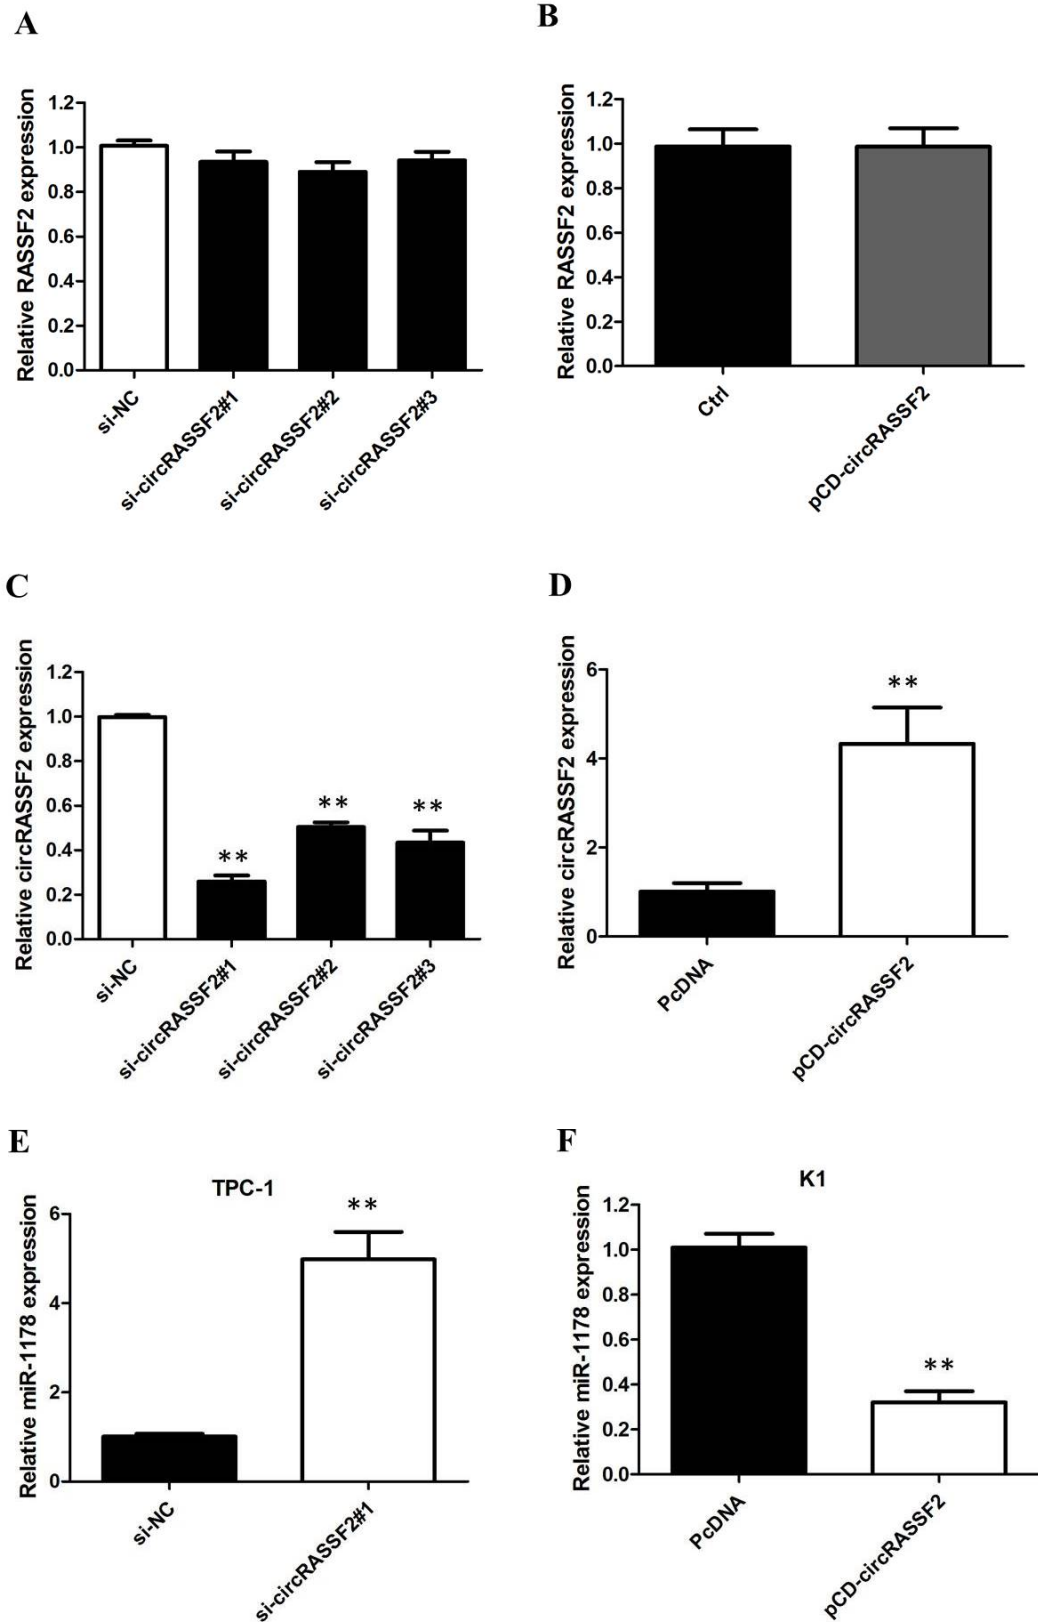

**Fig. S1. A.** The qRT-PCR assay indicated the relative abundance of

RASSF2 in TPC-1 cells treated with si-circRASSF2. B. The qRT-PCR assay indicated the relative abundance of RASSF2 in K1 cells infected with circRASSF2 overexpression plasmid. C. The qRT-PCR assay indicated the relative abundance of circRASSF2 in TPC-1 cells treated with si-circRASSF2. D. The qRT-PCR assay indicated the relative abundance of circRASSF2 in K1 cells infected with circRASSF2 overexpression plasmid. E. The qRT-PCR assay indicated that miR-1178 was efficiently upregulated by silenced circRASSF2; F. The qRT-PCR assay indicated that miR-1178 was efficiently downregulated by overexpressed circRASSF2. Data are the means  $\pm$  SD of three experiments.  $**P < 0.01$ .

**A**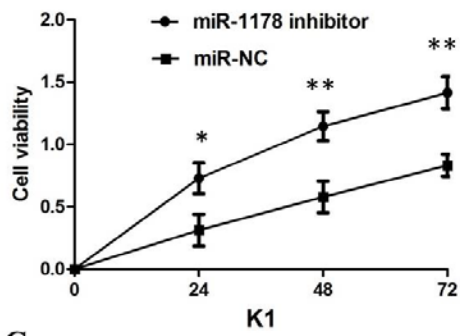**B**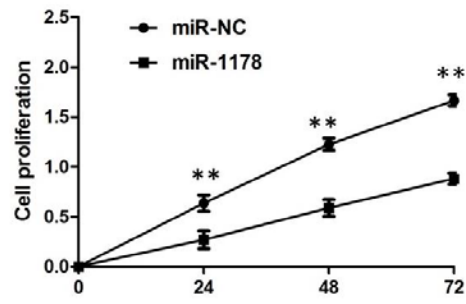**C**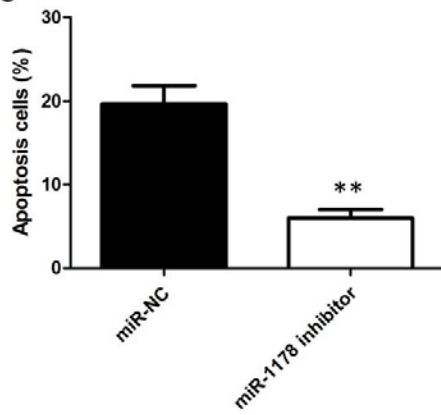**D**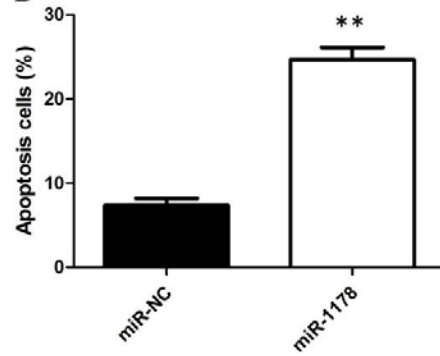**E**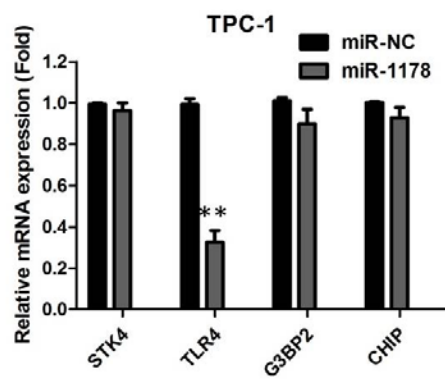**F**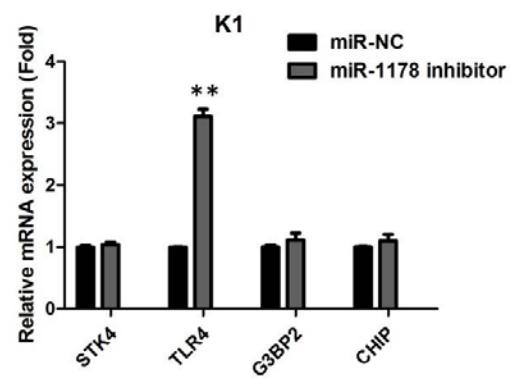**G**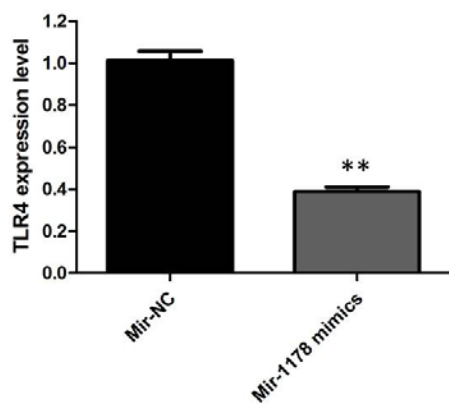**H**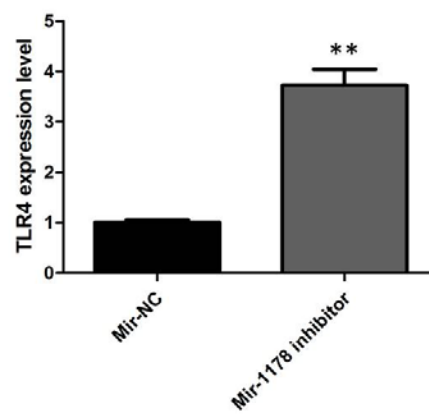

**Fig. S2** A. CCK-8 assay showed that miR-1178 inhibitor markedly promoted the cell growth of K1 cells when compared with cells transfected with miR-nc; B. CCK-8 assay showed that miR-1178 mimics markedly inhibited the proliferation of A2780 cells when compared with cells transfected with miR-nc; C. Flow cytometric analysis showed that miR-11178 inhibitor decreased the apoptosis of K1 cells; D. Flow cytometric analysis showed that miR-1178 mimics significantly induced apoptosis of TPC-1 cells; E. The qRT-PCR assay indicated the relative abundance of mRNAs of STK4, TLR4, G3BP2, and CHIP in TPC-1 cells transfected with a miR-1178 mimic; F. The qRT-PCR assay indicated the relative abundance of STK4, TLR4, G3BP2, and CHIP in K1 cells transfected with a miR-1178 inhibitor; G. The qRT-PCR assay indicated the relative abundance of TLR4 in TPC-1 cells transfected with miR-1178 mimics; H. The qRT-PCR assay indicated the relative abundance of TLR4 in K1 cells transfected with miR-1178 inhibitors; Data are the means  $\pm$  SD of three experiments.  $**P < 0.05$ ;  $***P < 0.01$ .
